# Supplementary material for: Semi-Synthesis, Cytotoxic Evaluation, and Structure—Activity Relationships of Brefeldin A Derivatives with Antileukemia Activity
Source: MDPI journal article supplement (doi:10.3390/md20010026), 2021-12-24
Supplement: s1 [file s1]

# Semi-synthesis, Cytotoxic Evaluation, and Structure-Activity Relationships of Brefeldin A Derivatives with Antileukemia Activity

Xu-Xiu Lu <sup>1,2,#</sup>, Yao-Yao Jiang <sup>1,2,#</sup>, Yan-Wei Wu <sup>1,2</sup>, Guang-Ying Chen <sup>3</sup>, Chang-Lun Shao <sup>1,2</sup>, Yu-Cheng Gu <sup>4</sup>, Ming Liu <sup>1,2,5,\*</sup> and Mei-Yan Wei <sup>1,6,\*</sup>

<sup>1</sup> Key Laboratory of Marine Drugs, The Ministry of Education of China, School of Medicine and Pharmacy, Ocean University of China, Qingdao 266003, China; 11200811024@stu.ouc.edu.cn (X.-X.L.); jiangyaoyao1226@163.com (Y.-Y.J.); wuyanwei1214@163.com (Y.-W.W.); lmouc@ouc.edu.cn (M.L.); shaochanglun@163.com (C.-L.S.); mywei95@126.com (M.-Y.W.)

<sup>2</sup> Laboratory for Marine Drugs and Bioproducts, Qingdao National Laboratory for Marine Science and Technology, Qingdao 266200, China

<sup>3</sup> Key Laboratory of Tropical Medicinal Resource Chemistry of Ministry of Education, College of Chemistry and Chemical Engineering, Hainan Normal University, Haikou 571158, China; chgying123@163.com (G.-Y.C.)

<sup>4</sup> Syngenta Jealott's Hill International Research Centre, Bracknell, Berkshire, RG42 6EY, United Kingdom; yucheng.gu@syngenta.com (Y.-C.G.)

<sup>5</sup> State Key Laboratory for Chemistry and Molecular Engineering of Medicinal Resources, Guangxi Normal University, Guilin 541001, China

<sup>6</sup> College of Food Science and Engineering, Ocean University of China, Qingdao 266003, China

\* Correspondence: lmouc@ouc.edu.cn (M.L.); mywei95@126.com (M.-Y.W.); Tel.: +86-532-8203-1980 (M.L.); +86-532-8203-1381 (M.-Y.W.)

# These authors contributed equally to this work.

## Content of Supporting Information

### Compound Characterization Spectra

**Figure S1.**  $^1\text{H}$  NMR (500 MHz,  $\text{DMSO}-d_6$ ) spectrum of compound **1**.

**Figure S2.**  $^{13}\text{C}$  NMR (125 MHz,  $\text{DMSO}-d_6$ ) spectrum of compound **1**.

**Figure S3.** ESIMS spectrum of compound **1**.

**Figure S4.**  $^1\text{H}$  NMR (400 MHz,  $\text{CDCl}_3$ ) spectrum of compound **2**.

**Figure S5.**  $^{13}\text{C}$  NMR (100 MHz,  $\text{CDCl}_3$ ) spectrum of compound **2**.

**Figure S6.** ESIMS spectrum of compound **2**.

**Figure S7.**  $^1\text{H}$  NMR (500 MHz,  $\text{CDCl}_3$ ) spectrum of compound **3**.

**Figure S8.**  $^{13}\text{C}$  NMR (100 MHz,  $\text{CDCl}_3$ ) spectrum of compound **3**.

**Figure S9.** HRESIMS spectrum of compound **3**.

**Figure S10.**  $^1\text{H}$  NMR (400 MHz,  $\text{CDCl}_3$ ) spectrum of compound **4**.

**Figure S11.**  $^{13}\text{C}$  NMR (100 MHz,  $\text{CDCl}_3$ ) spectrum of compound **4**.

**Figure S12.** HRESIMS spectrum of compound **4**.

**Figure S13.**  $^1\text{H}$  NMR (500 MHz,  $\text{CDCl}_3$ ) spectrum of compound **5**.

**Figure S14.**  $^{13}\text{C}$  NMR (125 MHz,  $\text{CDCl}_3$ ) spectrum of compound **5**.

**Figure S15.** HRESIMS spectrum of compound **5**.

**Figure S16.**  $^1\text{H}$  NMR (500 MHz,  $\text{CDCl}_3$ ) spectrum of compound **6**.

**Figure S17.**  $^{13}\text{C}$  NMR (125 MHz,  $\text{CDCl}_3$ ) spectrum of compound **6**.

**Figure S18.** HRESIMS spectrum of compound **6**.

**Figure S19.**  $^1\text{H}$  NMR (400 MHz,  $\text{CDCl}_3$ ) spectrum of compound **7**.

**Figure S20.**  $^{13}\text{C}$  NMR (100 MHz,  $\text{CDCl}_3$ ) spectrum of compound **7**.

**Figure S21.** HRESIMS spectrum of compound **7**.

**Figure S22.**  $^1\text{H}$  NMR (400 MHz,  $\text{CDCl}_3$ ) spectrum of compound **8**.

**Figure S23.**  $^{13}\text{C}$  NMR (100 MHz,  $\text{CDCl}_3$ ) spectrum of compound **8**.

**Figure S24.** HRESIMS spectrum of compound **8**.

**Figure S25.**  $^1\text{H}$  NMR (400 MHz,  $\text{CDCl}_3$ ) spectrum of compound **9**.

**Figure S26.**  $^{13}\text{C}$  NMR (100 MHz,  $\text{CDCl}_3$ ) spectrum of compound **9**.

**Figure S27.** HRESIMS spectrum of compound **9**.

**Figure S28.**  $^1\text{H}$  NMR (600 MHz,  $\text{CDCl}_3$ ) spectrum of compound **10**.

**Figure S29.**  $^{13}\text{C}$  NMR (150 MHz,  $\text{CDCl}_3$ ) spectrum of compound **10**.

**Figure S30.** HRESIMS spectrum of compound **10**.

**Figure S31.**  $^1\text{H}$  NMR (600 MHz,  $\text{CDCl}_3$ ) spectrum of compound **11**.

**Figure S32.**  $^{13}\text{C}$  NMR (150 MHz,  $\text{CDCl}_3$ ) spectrum of compound **11**.

**Figure S33.** HRESIMS spectrum of compound **11**.

**Figure S34.**  $^1\text{H}$  NMR (600 MHz,  $\text{CDCl}_3$ ) spectrum of compound **12**.

**Figure S35.**  $^{13}\text{C}$  NMR (125 MHz,  $\text{CDCl}_3$ ) spectrum of compound **12**.

**Figure S36.** HRESIMS spectrum of compound **12**.

**Figure S37.**  $^1\text{H}$  NMR (400 MHz,  $\text{CDCl}_3$ ) spectrum of compound **13**.

**Figure S38.**  $^{13}\text{C}$  NMR (100 MHz,  $\text{CDCl}_3$ ) spectrum of compound **13**.

**Figure S39.** HRESIMS spectrum of compound **13**.

**Figure S40.**  $^1\text{H}$  NMR (600 MHz,  $\text{CDCl}_3$ ) spectrum of compound **14**.

**Figure S41.**  $^{13}\text{C}$  NMR (150 MHz,  $\text{CDCl}_3$ ) spectrum of compound **14**.

**Figure S42.** HRESIMS spectrum of compound **14**.

**Figure S43.**  $^1\text{H}$  NMR (600 MHz,  $\text{CDCl}_3$ ) spectrum of compound **15**.

**Figure S44.**  $^{13}\text{C}$  NMR (150 MHz,  $\text{CDCl}_3$ ) spectrum of compound **15**.

**Figure S45.** HRESIMS spectrum of compound **15**.

**Figure S46.**  $^1\text{H}$  NMR (500 MHz,  $\text{CDCl}_3$ ) spectrum of compound **16**.

**Figure S47.**  $^{13}\text{C}$  NMR (100 MHz,  $\text{CDCl}_3$ ) spectrum of compound **16**.

**Figure S48.** HRESIMS spectrum of compound **16**.

*Brefeldin A (1)*

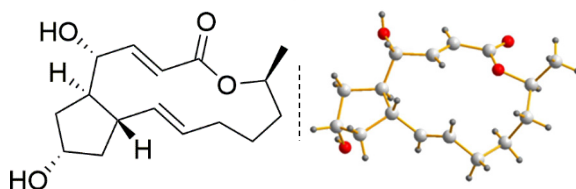

Known compound, white, amorphous powder;  $^1\text{H}$  NMR (500 MHz,  $\text{DMSO}-d_6$ )  $\delta$  7.34 (1H, dd,  $J$  = 15.5, 3.0 Hz, H-3), 5.75–5.60 (2H, overlapped, H-2, H-11), 5.20 (1H, dd,  $J$  = 15.2, 9.6 Hz, H-10), 5.10 (1H, s, 4-OH), 4.71 (1H, m, H-15), 4.48 (1H, s, 7-OH), 4.04 (1H, m, H-7), 3.92 (1H, d,  $J$  = 9.2 Hz, H-4), 2.30 (1H, m, H-9), 2.02–1.87 (2H, overlapped, H-8, H-12), 1.87–1.60 (6H, overlapped, H-5, H-6a, H-6b, H-12, H-13, H-14), 1.47 (1H, m, H-14), 1.30 (1H, m, H-8), 1.18 (3H, d,  $J$  = 6.3 Hz, 16- $\text{CH}_3$ ), 0.75 (1H, m, H-13);  $^{13}\text{C}$  NMR (125 MHz,  $\text{DMSO}-d_6$ )  $\delta$  165.7 (C-1), 154.4 (C-3), 137.1 (C-10), 129.2 (C-11), 116.3 (C-2), 74.3 (C-4), 70.9 (C-15), 70.5 (C-7), 51.7 (C-5), 43.3 (C-9), 43.1 (C-8), 40.9 (C-6), 33.4 (C-14), 31.5 (C-12), 26.5 (C-13), 20.7 (C-16); ESIMS  $m/z$  281.17  $[\text{M} + \text{H}]^+$ , 263.19  $[\text{M} + \text{H} - \text{H}_2\text{O}]^+$ , 245.19  $[\text{M} + \text{H} - 2\text{H}_2\text{O}]^+$ .

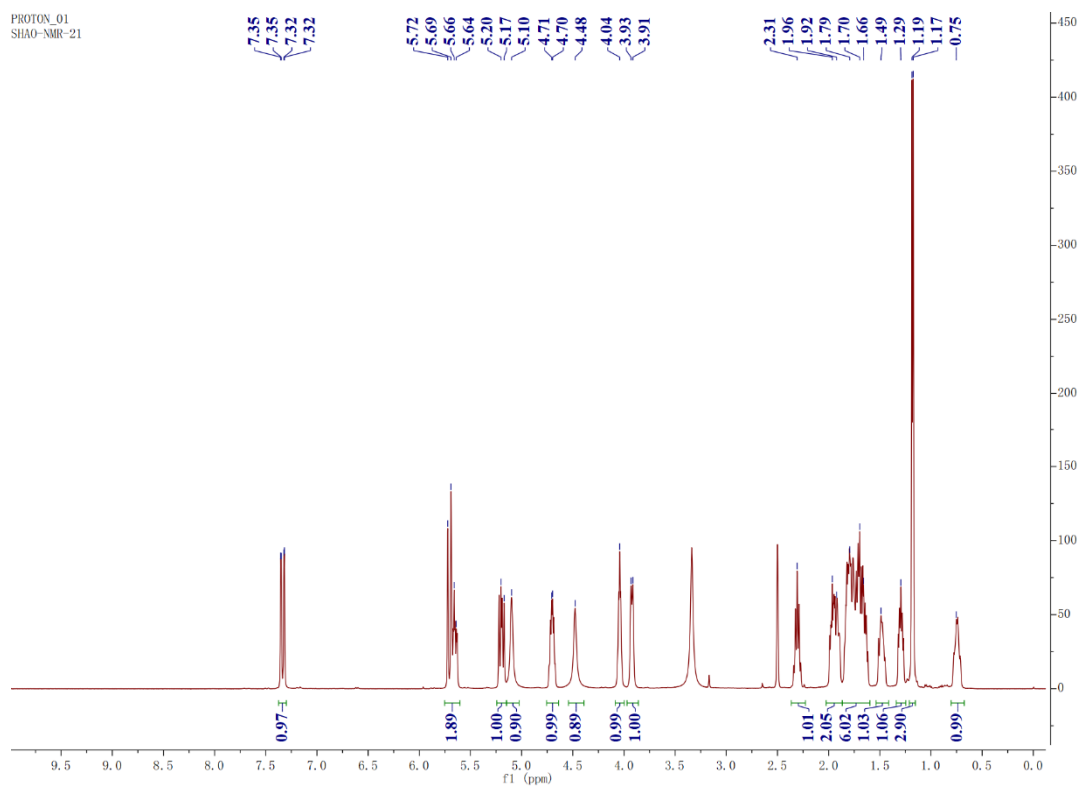

**Figure S1.**  $^1\text{H}$  NMR (500 MHz,  $\text{DMSO}-d_6$ ) spectrum of compound **1**.

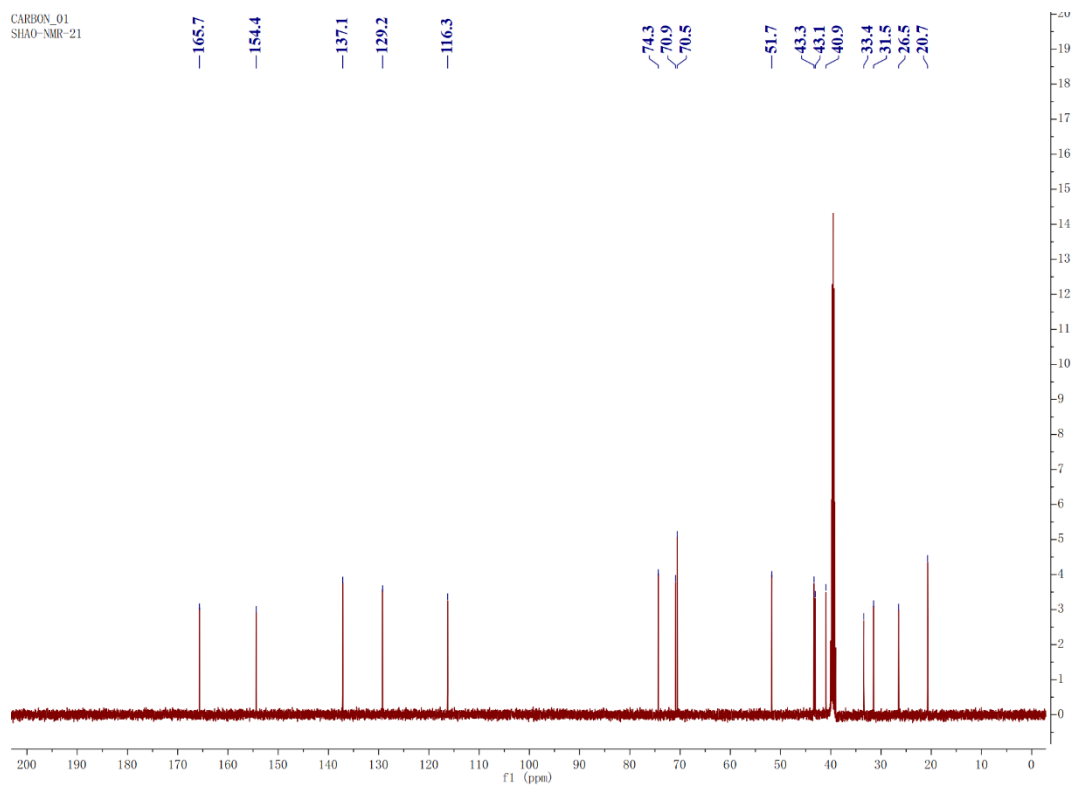

**Figure S2.**  $^{13}\text{C}$  NMR (125 MHz,  $\text{DMSO}-d_6$ ) spectrum of compound **1**.

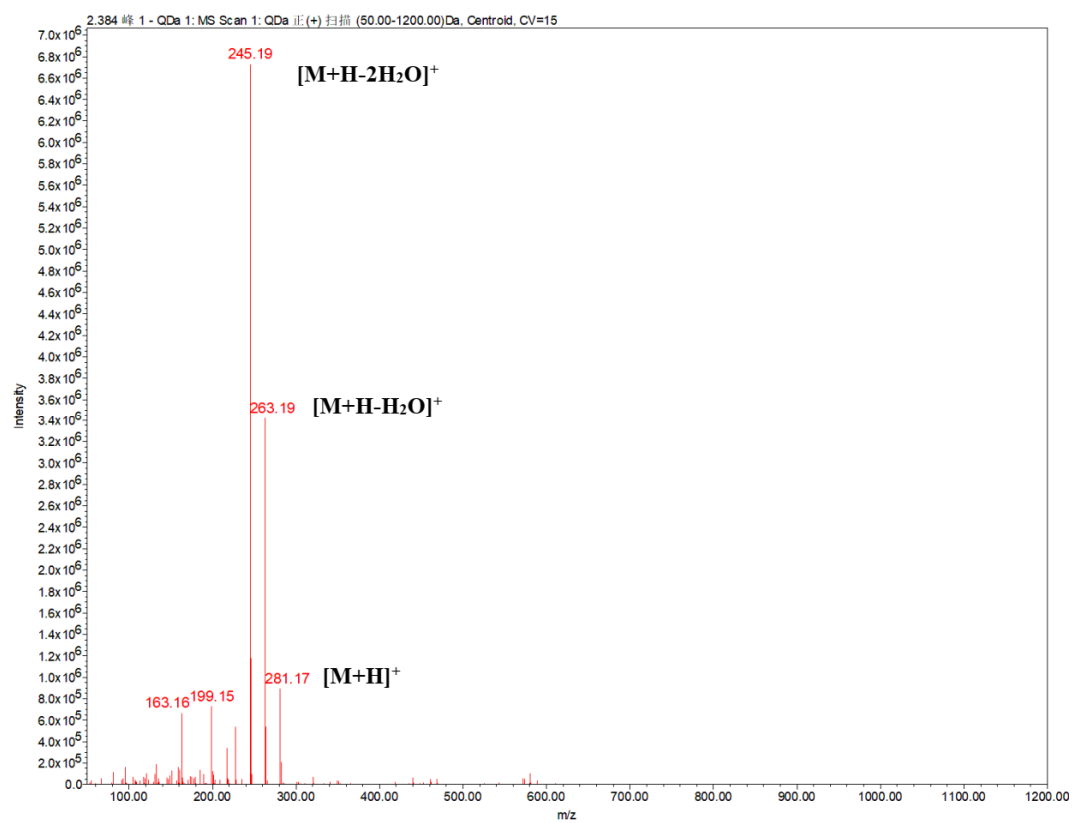

**Figure S3.** ESIMS spectrum of compound **1**.

*Brefeldin A 7-O-benzoate (2)*

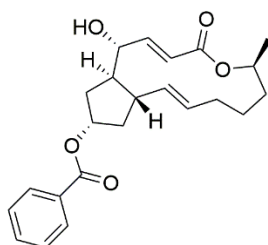

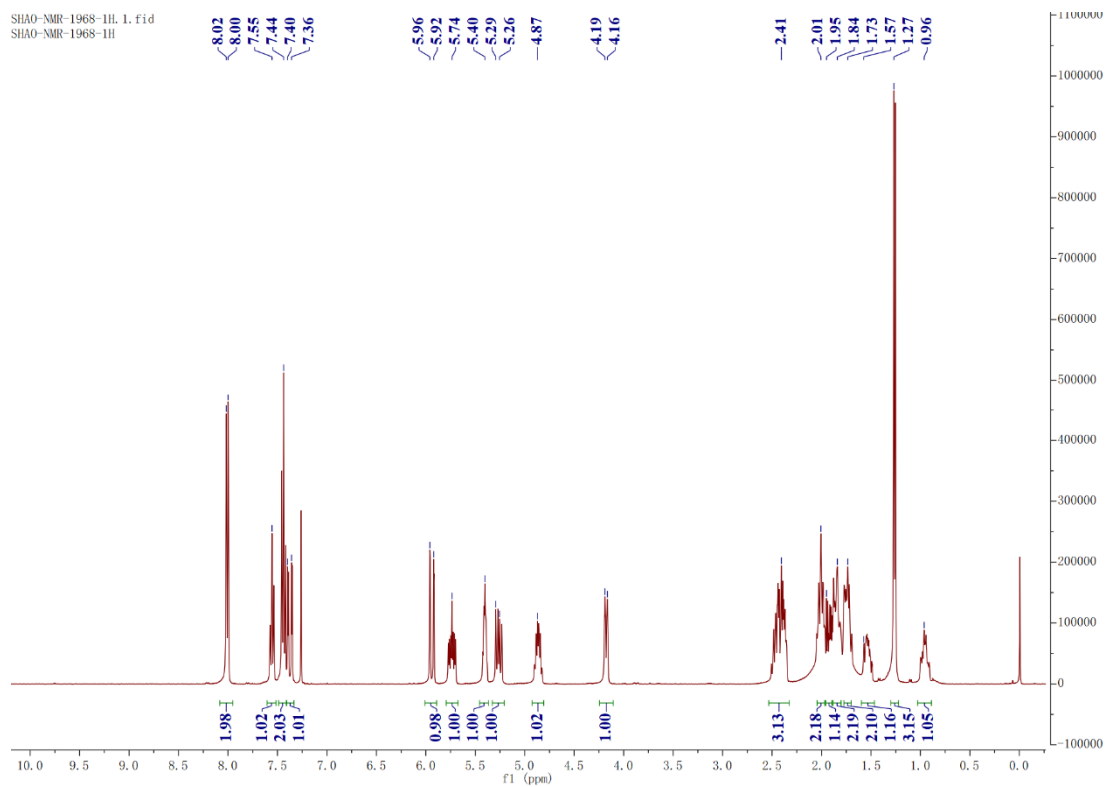

**Figure S4.**  $^1\text{H}$  NMR (400 MHz,  $\text{CDCl}_3$ ) spectrum of compound **2**.

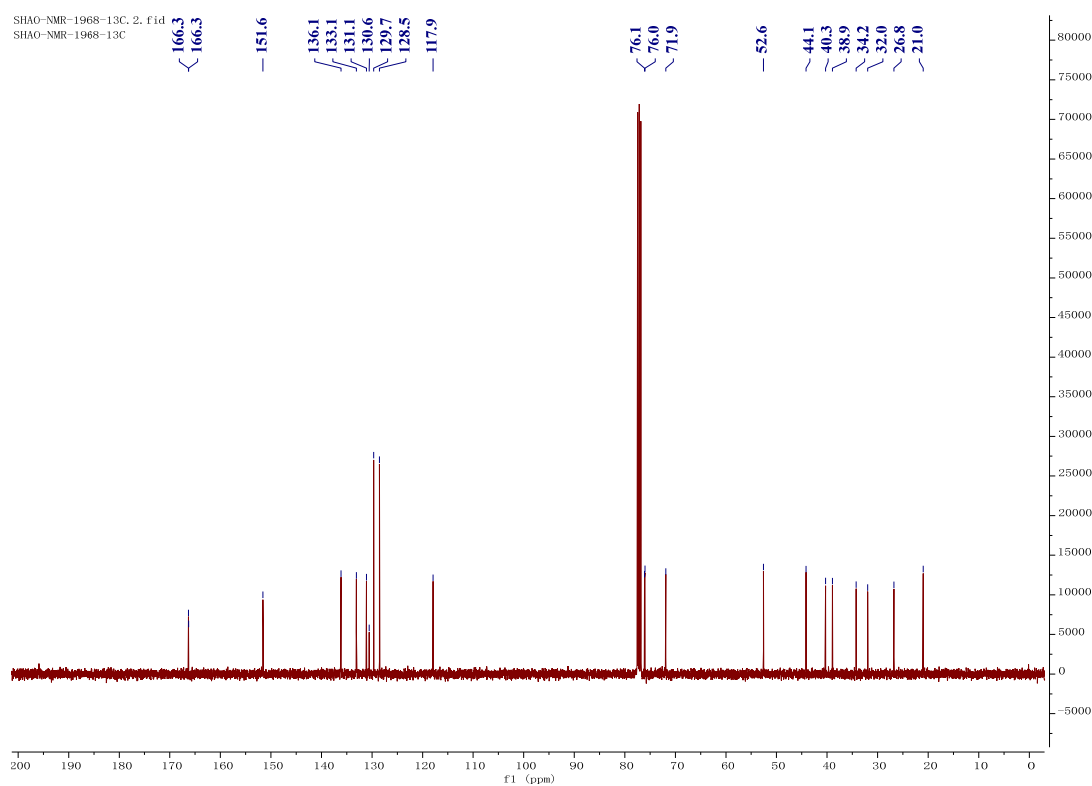

**Figure S5.**  $^{13}\text{C}$  NMR (100 MHz,  $\text{CDCl}_3$ ) spectrum of compound **2**.

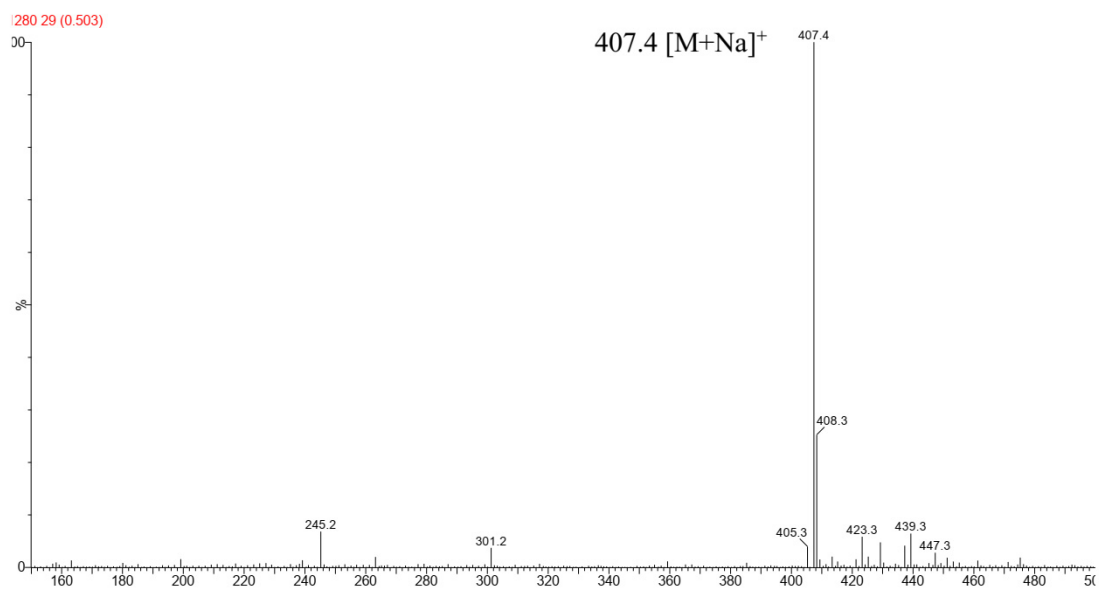

**Figure S6.** ESIMS spectrum of compound **2**.

*Brefeldin A 4,7-O-dibenzoate (3)*

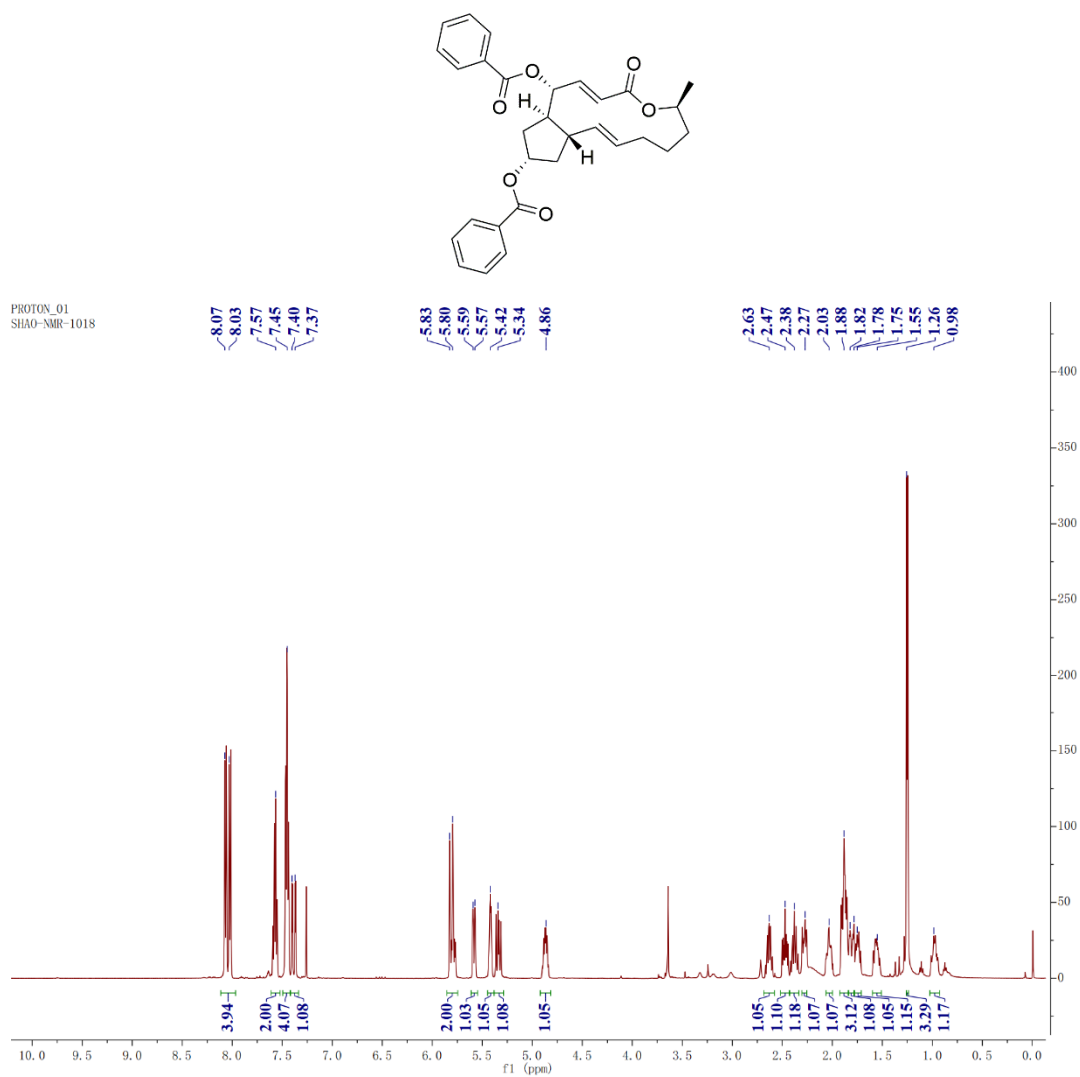

**Figure S7.**  $^1\text{H}$  NMR (500 MHz,  $\text{CDCl}_3$ ) spectrum of compound **3**.

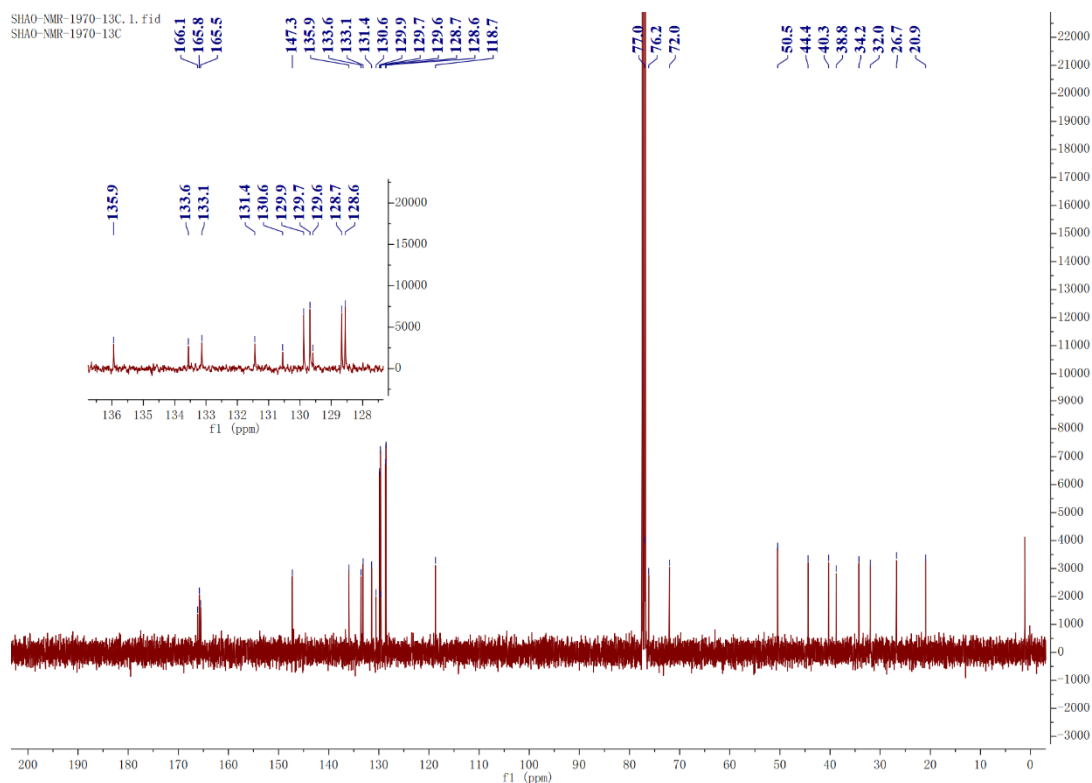

**Figure S8.**  $^{13}\text{C}$  NMR (100 MHz,  $\text{CDCl}_3$ ) spectrum of compound **3**.

CHNQD-01222 #485 RT: 4.73 AV: 1 NL: 4.61E5  
T: FTMS + p ESI Full ms [100.0000-1500.0000]

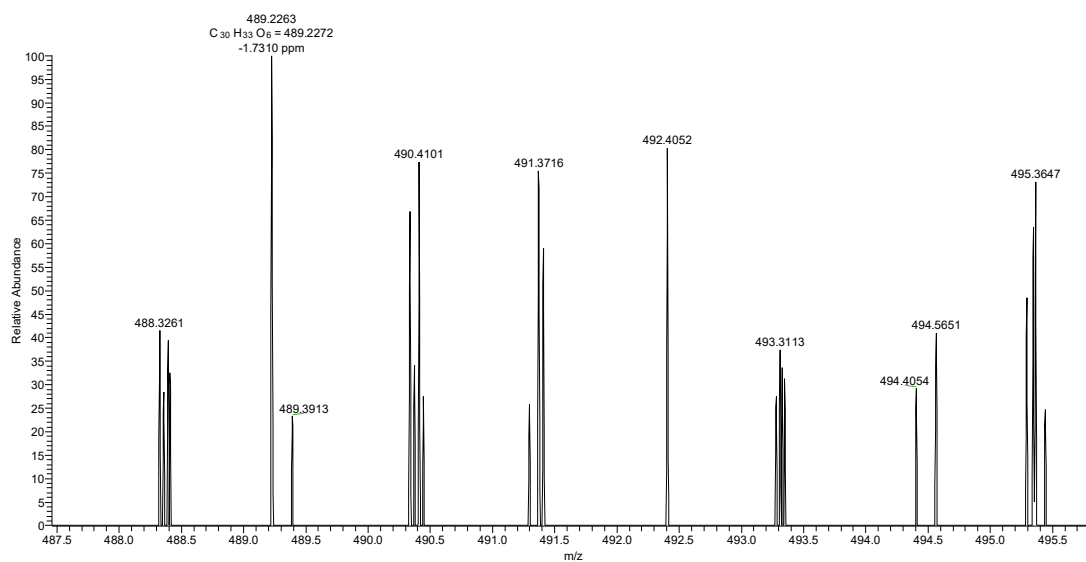

**Figure S9.** ESIMS spectrum of compound **3**.

*Brefeldin A 4-O-benzoate (4)*



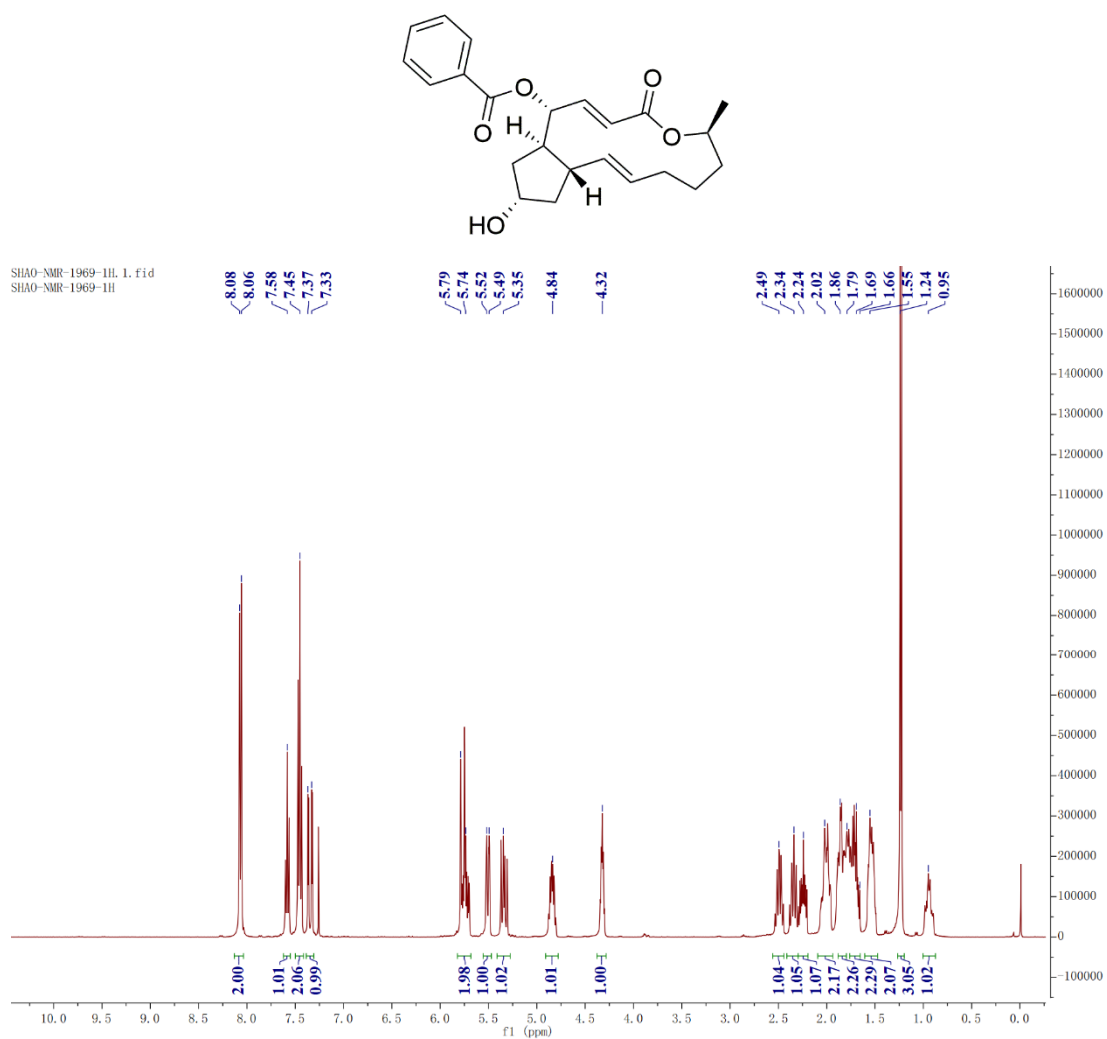

**Figure S10.** <sup>1</sup>H NMR (400 MHz, CDCl<sub>3</sub>) spectrum of compound **4**.

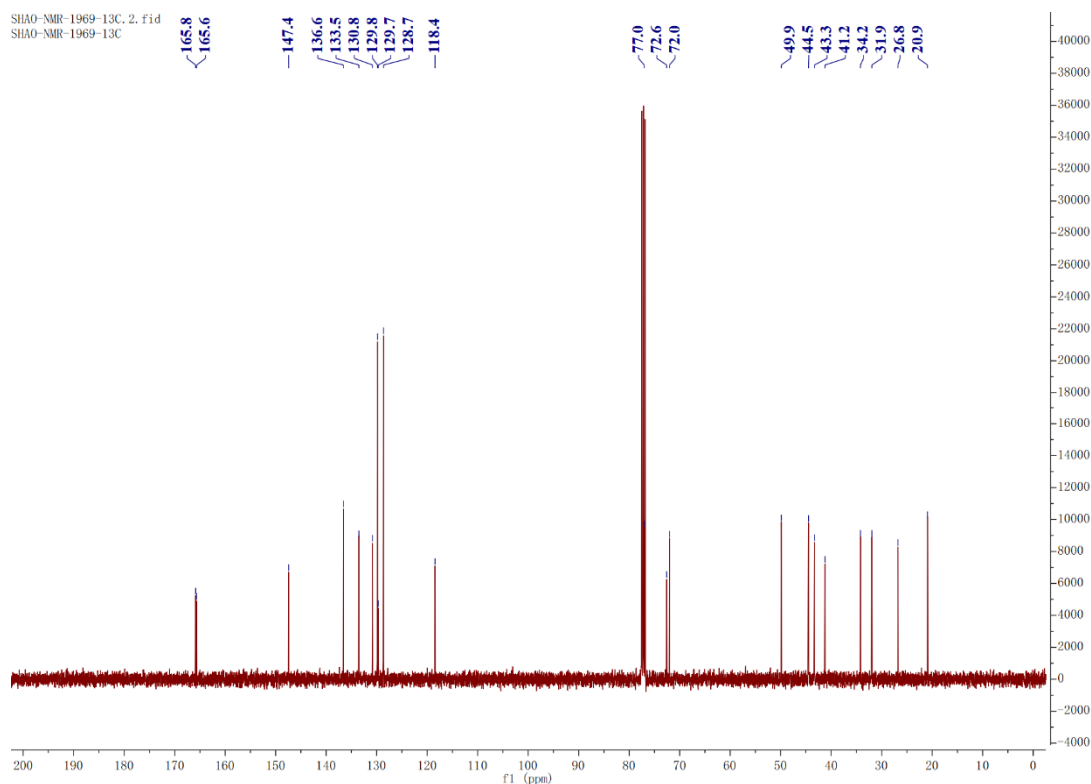

**Figure S11.**  $^{13}\text{C}$  NMR (100 MHz,  $\text{CDCl}_3$ ) spectrum of compound **4**.

CHNQD-01279 #13 RT: 0.16 AV: 1 NL: 4.58E6  
T: FTMS + p ESI Full ms [100.0000-1500.0000]

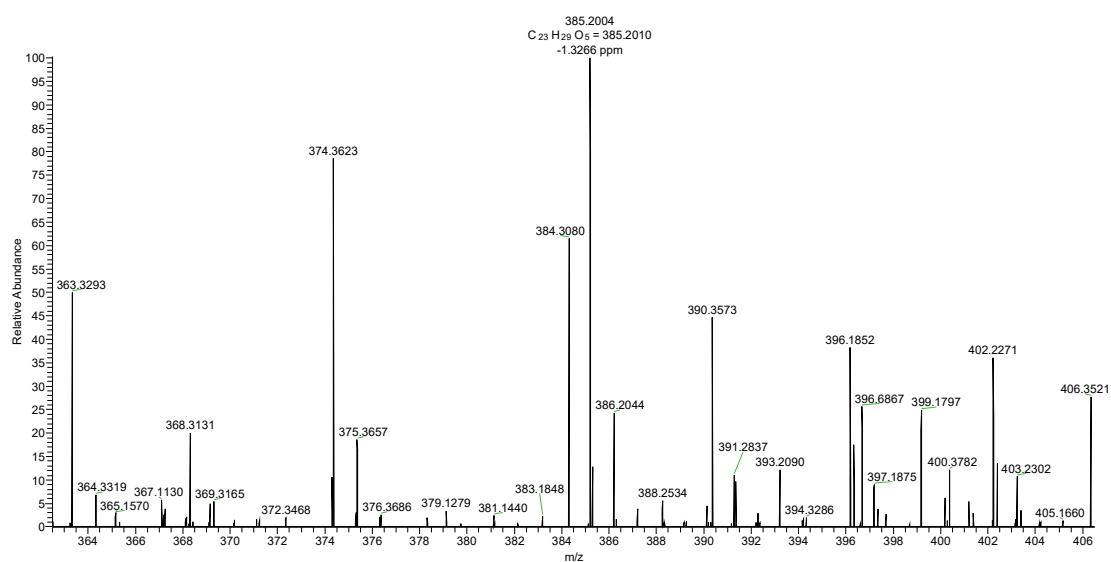

**Figure S12.** HRESIMS spectrum of compound **4**.

*Brefeldin A 7-O-(2,3,4)-trifluorobenzoate (5)*

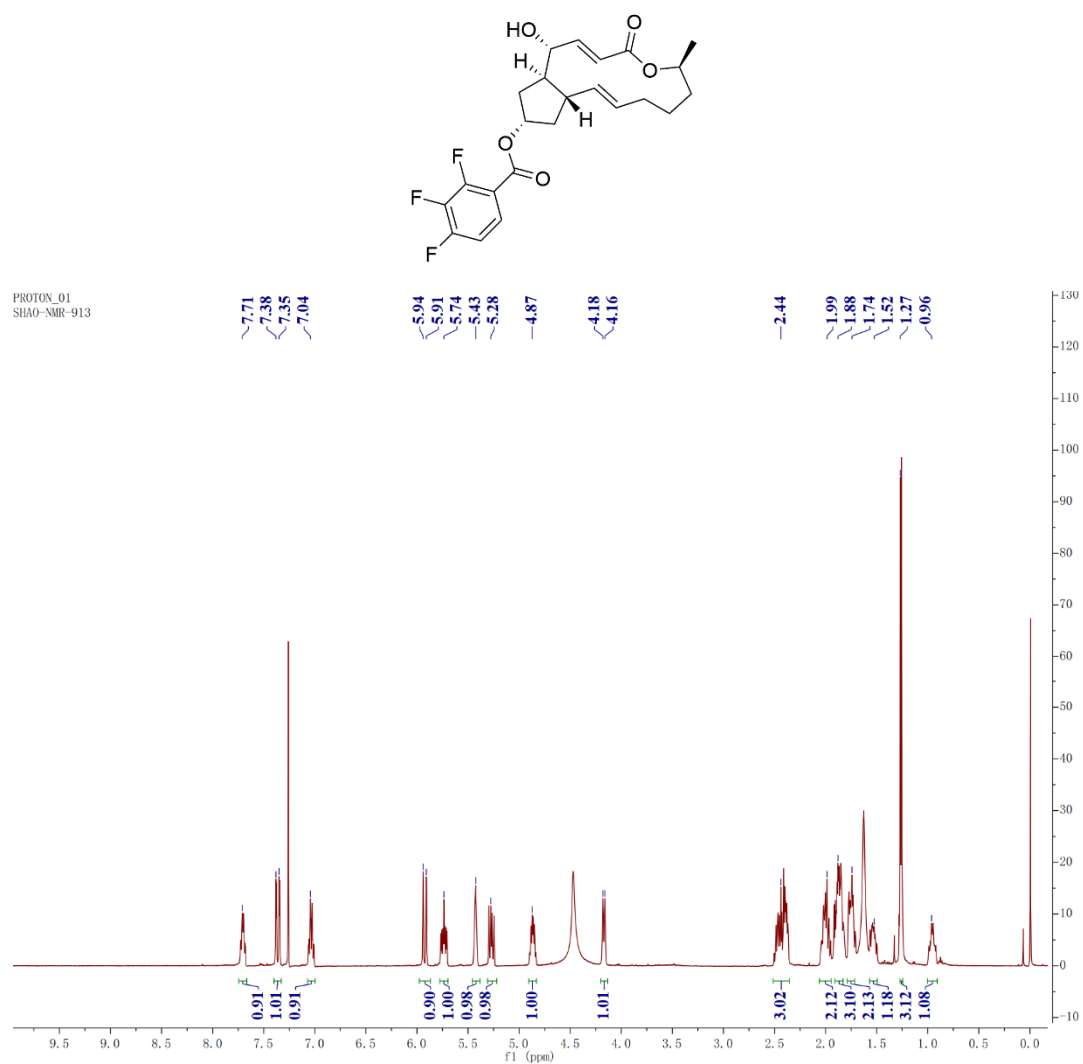

**Figure S13.** <sup>1</sup>H NMR (500 MHz, CDCl<sub>3</sub>) spectrum of compound 5.

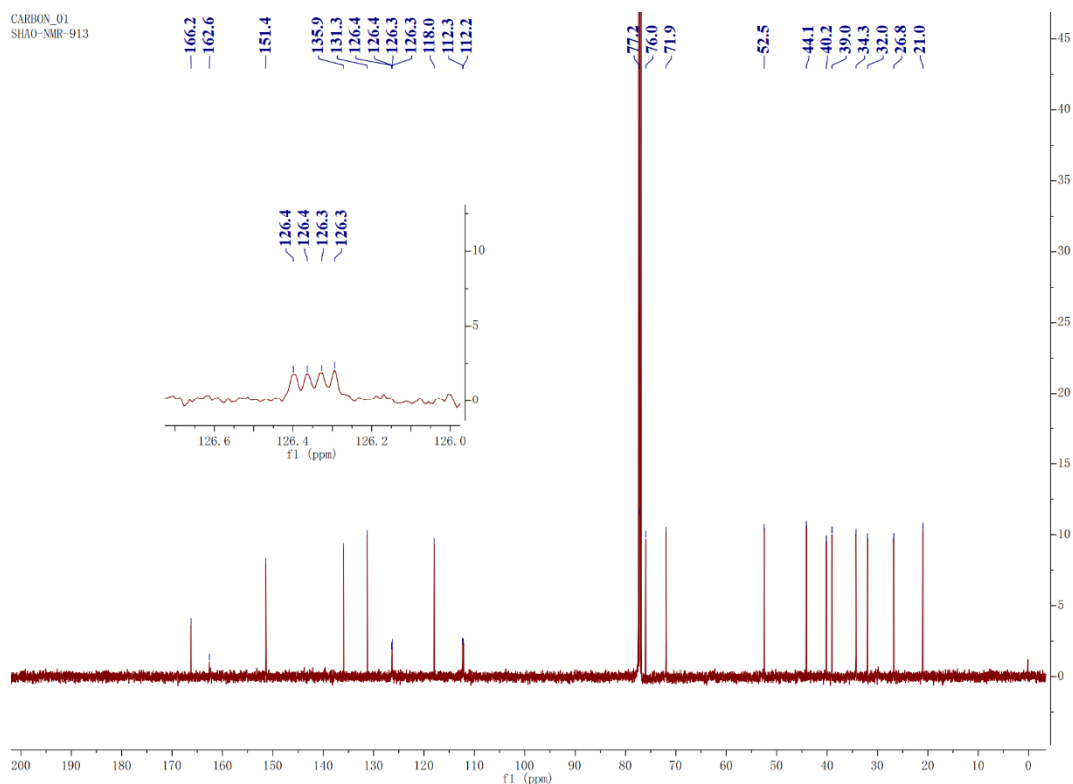

**Figure S14.**  $^{13}\text{C}$  NMR (125 MHz,  $\text{CDCl}_3$ ) spectrum of compound **5**.

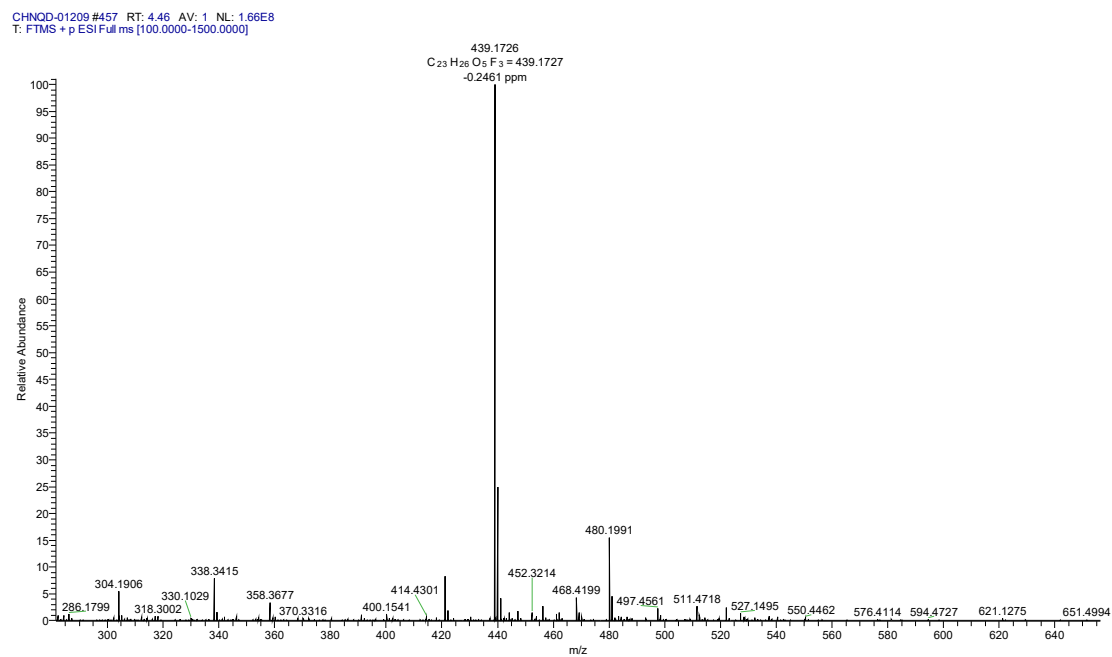

**Figure S15.** HRESIMS spectrum of compound **5**.

*Brefeldin A 4-O-(2,3,4)-trifluorobenzoate (6)*

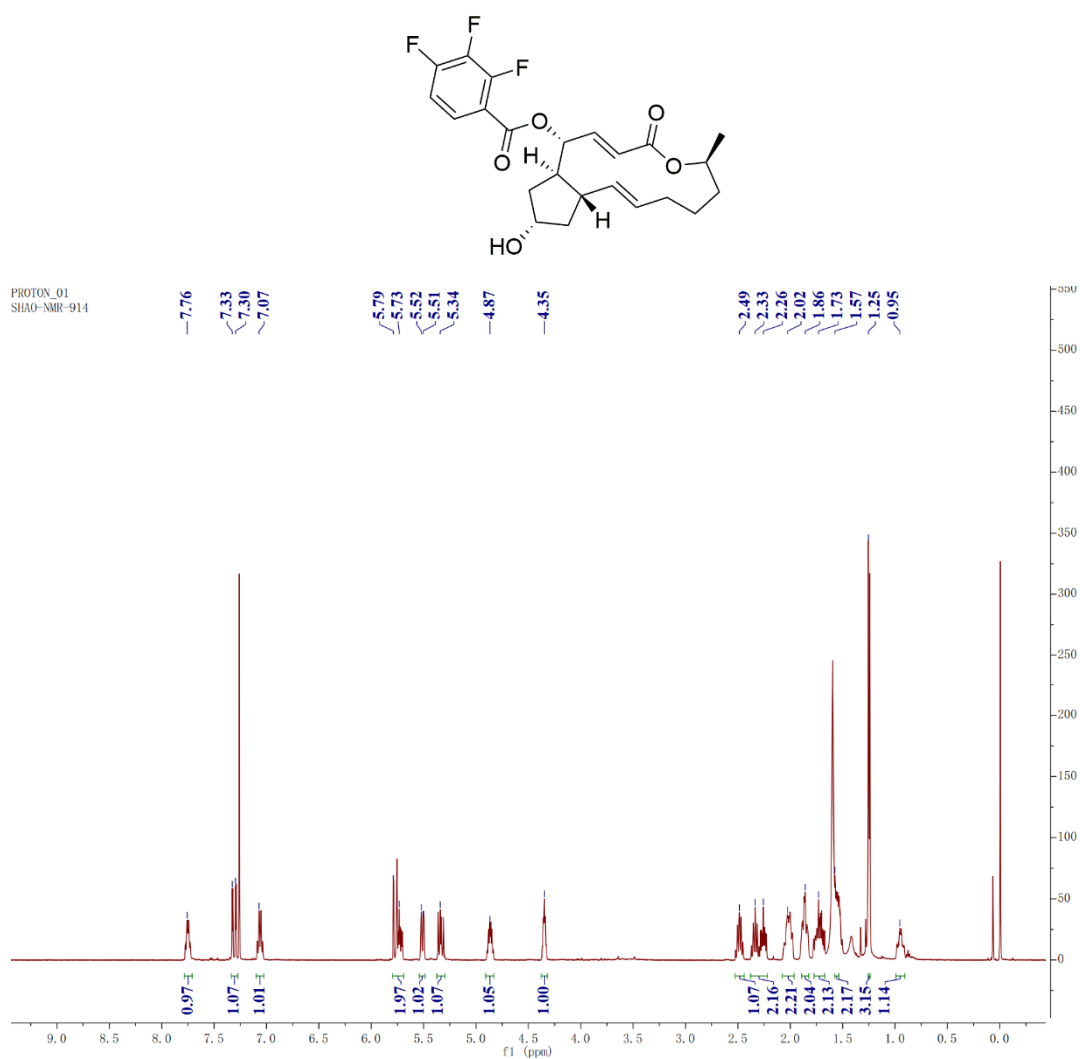

**Figure S16.**  $^1\text{H}$  NMR (500 MHz,  $\text{CDCl}_3$ ) spectrum of compound 6.

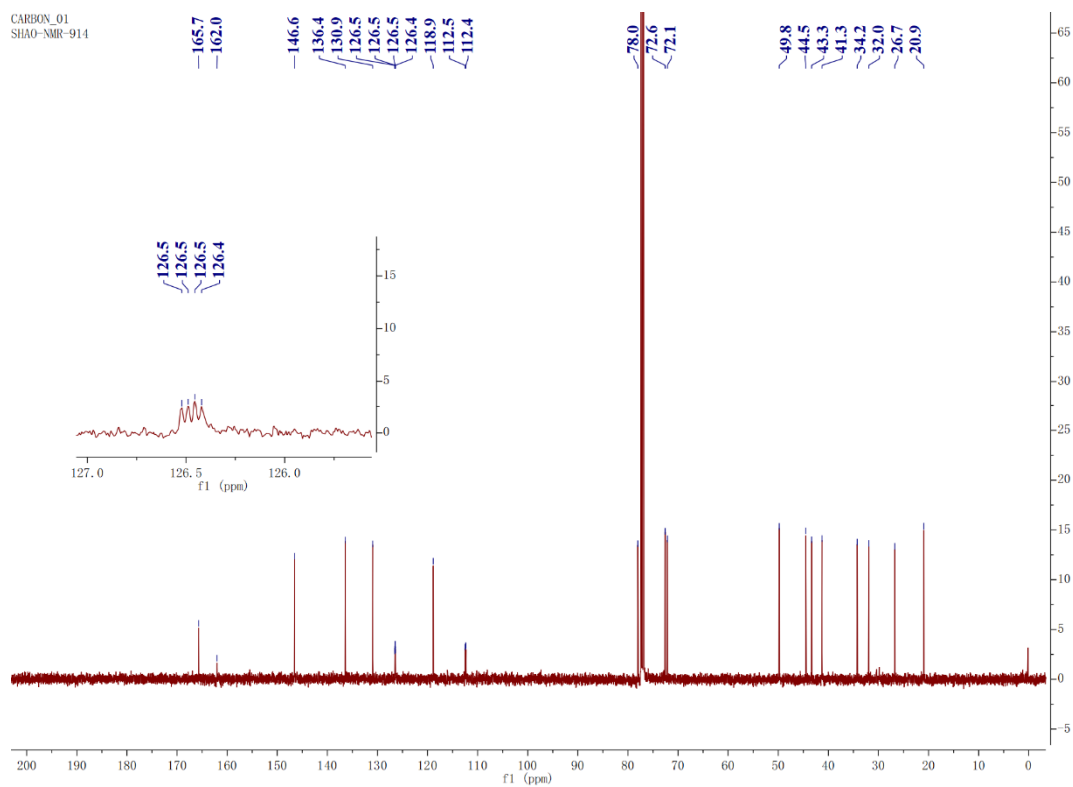

**Figure S17.**  $^{13}\text{C}$  NMR (125 MHz,  $\text{CDCl}_3$ ) spectrum of compound **6**.

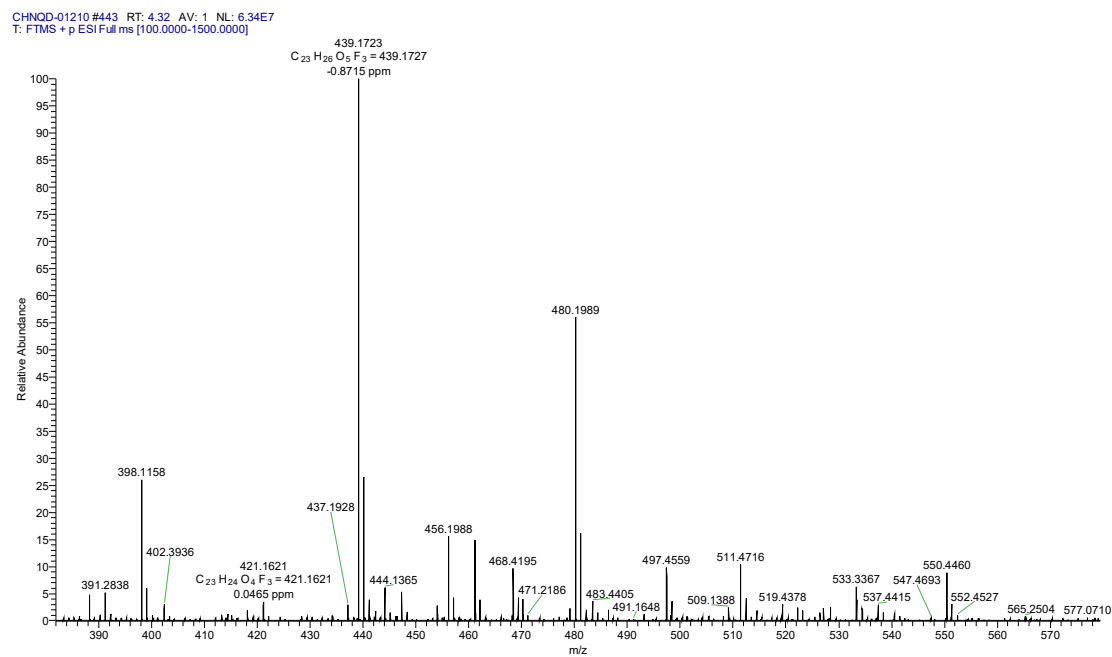

**Figure S18.** HRESIMS spectrum of compound **6**.

*Brefeldin A 7-O-2-chloro-4,5-difluorobenzoate (7)*

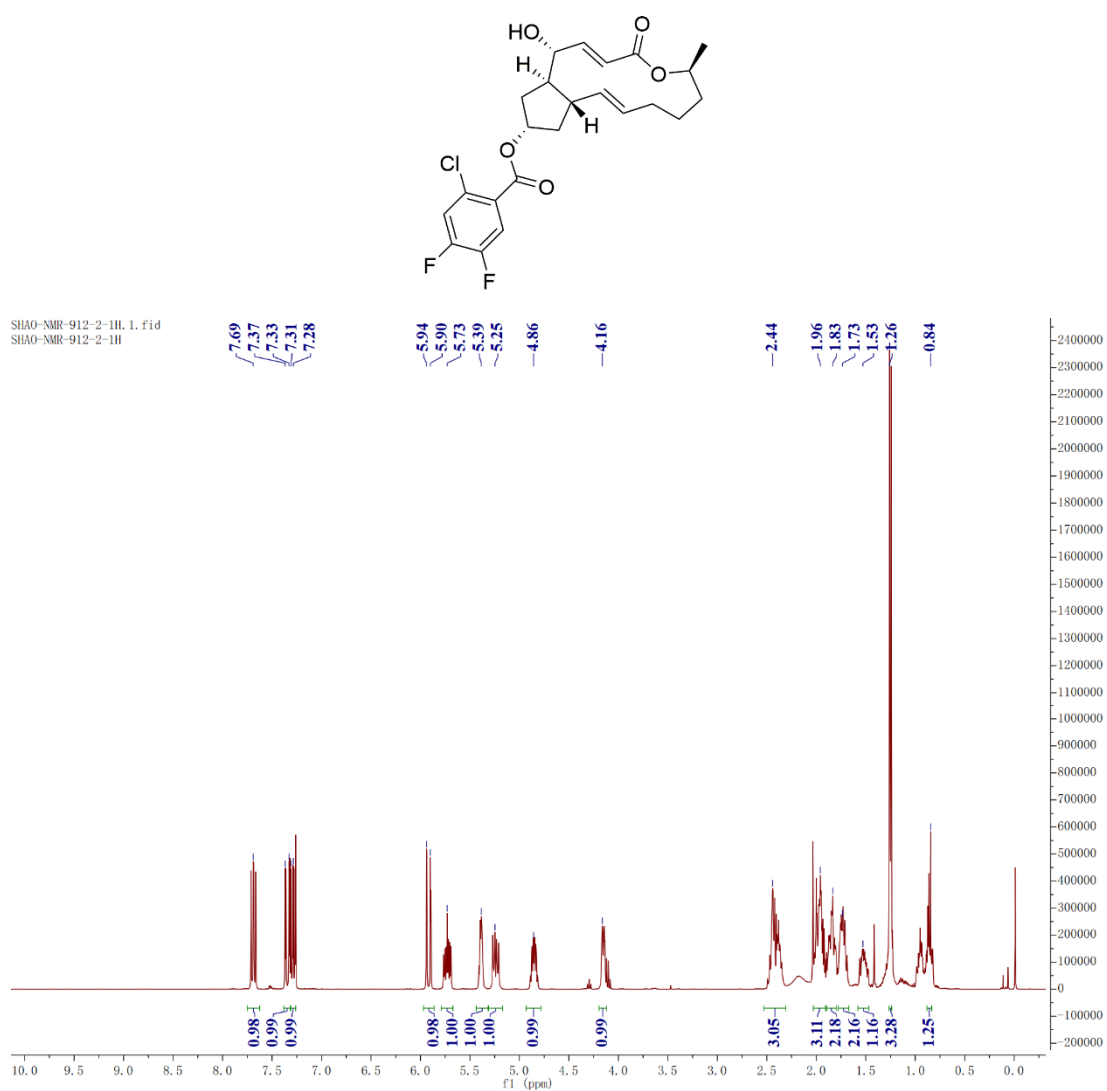

**Figure S19.**  $^1\text{H}$  NMR (400 MHz,  $\text{CDCl}_3$ ) spectrum of compound **7**.

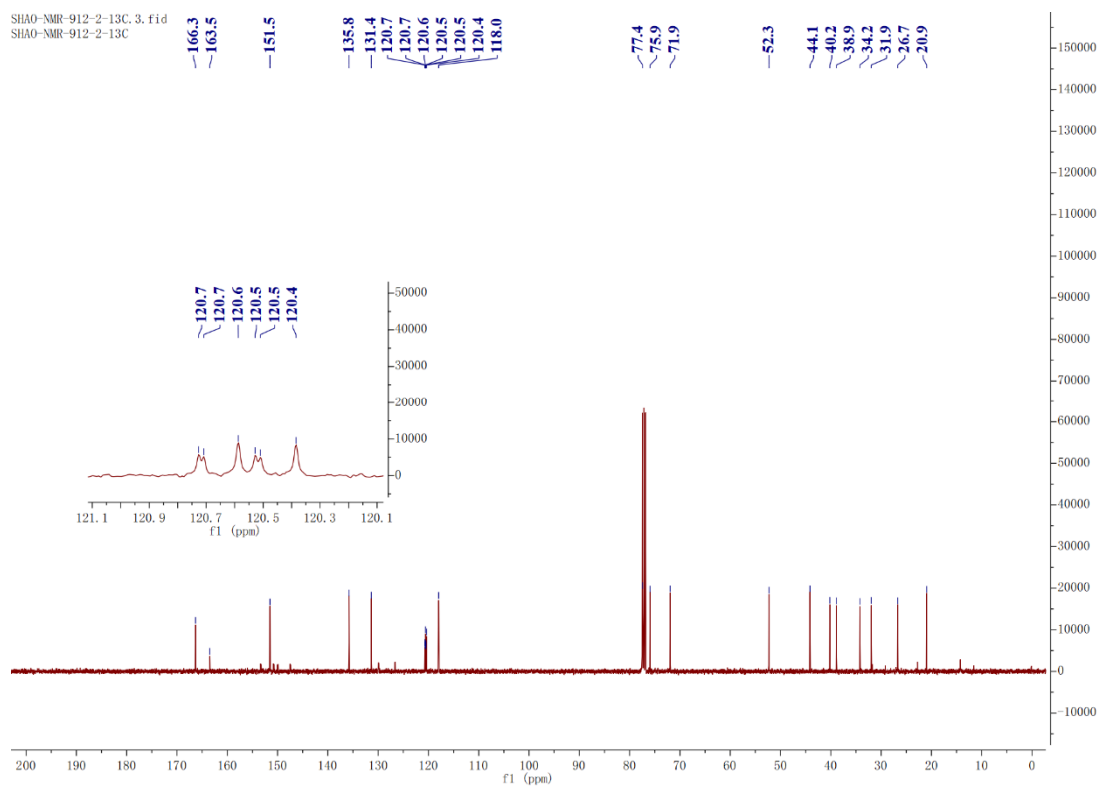

**Figure S20.**  $^{13}\text{C}$  NMR (100 MHz,  $\text{CDCl}_3$ ) spectrum of compound **7**.

CHNQD-01212-#471 RT: 4.60 AV: 1 NL: 1.83E8  
T: FTMS + p ESI Full ms [100.0000-1500.0000]

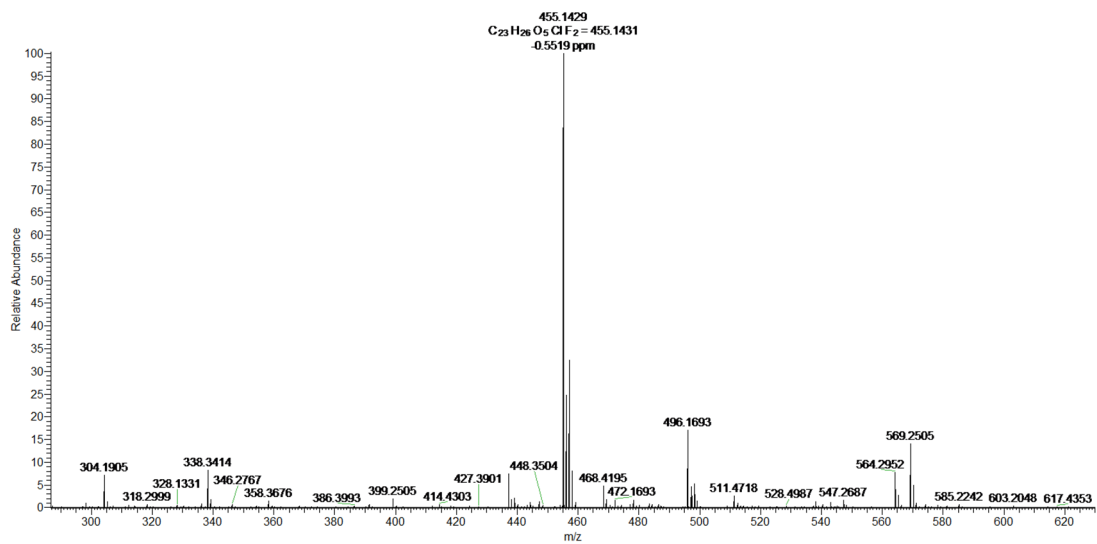

**Figure S21.** HRESIMS spectrum of compound **7**.

*Brefeldin A 4-O-2-chloro-4,5-difluorobenzoate (8)*



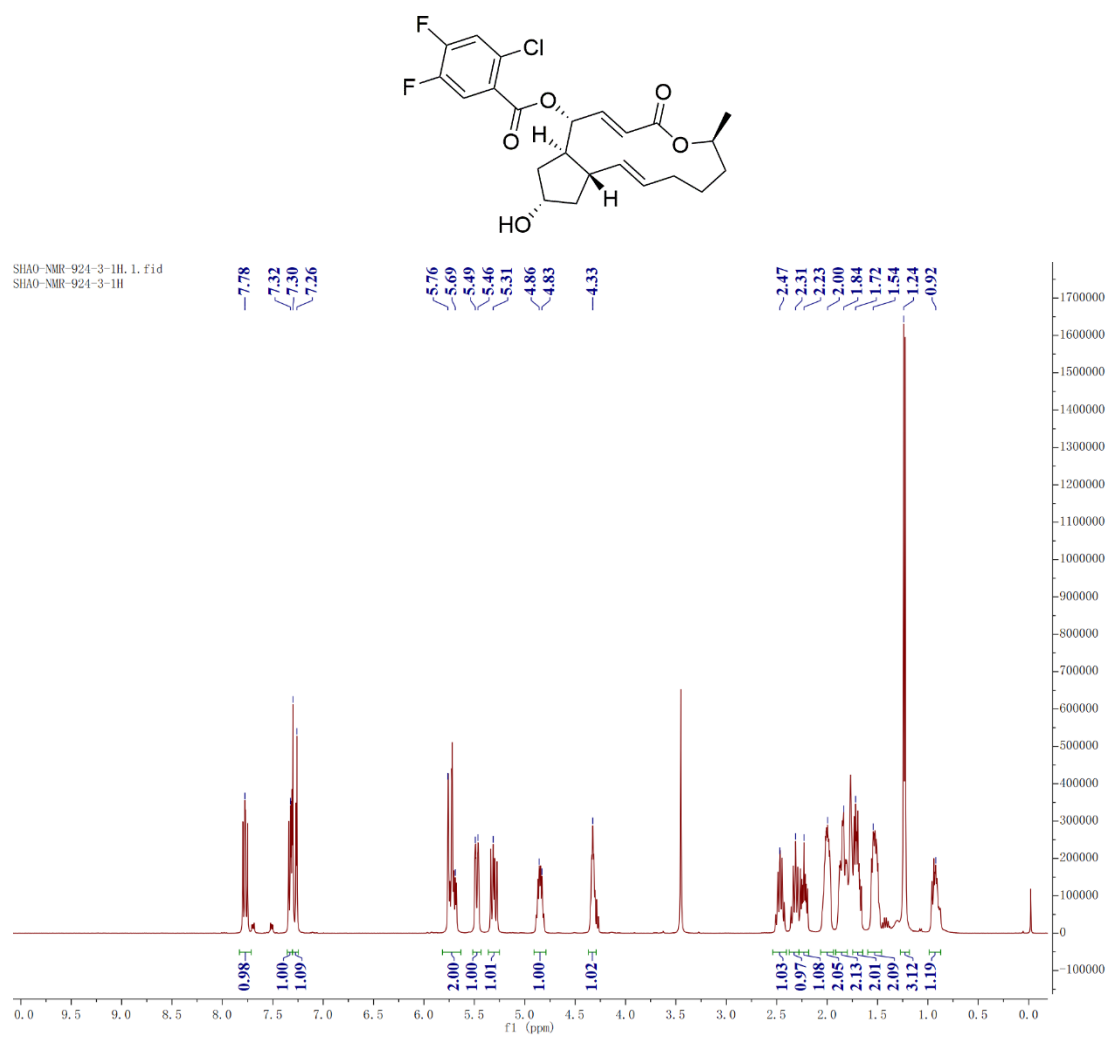

**Figure S22.** <sup>1</sup>H NMR (400 MHz, CDCl<sub>3</sub>) spectrum of compound 8.

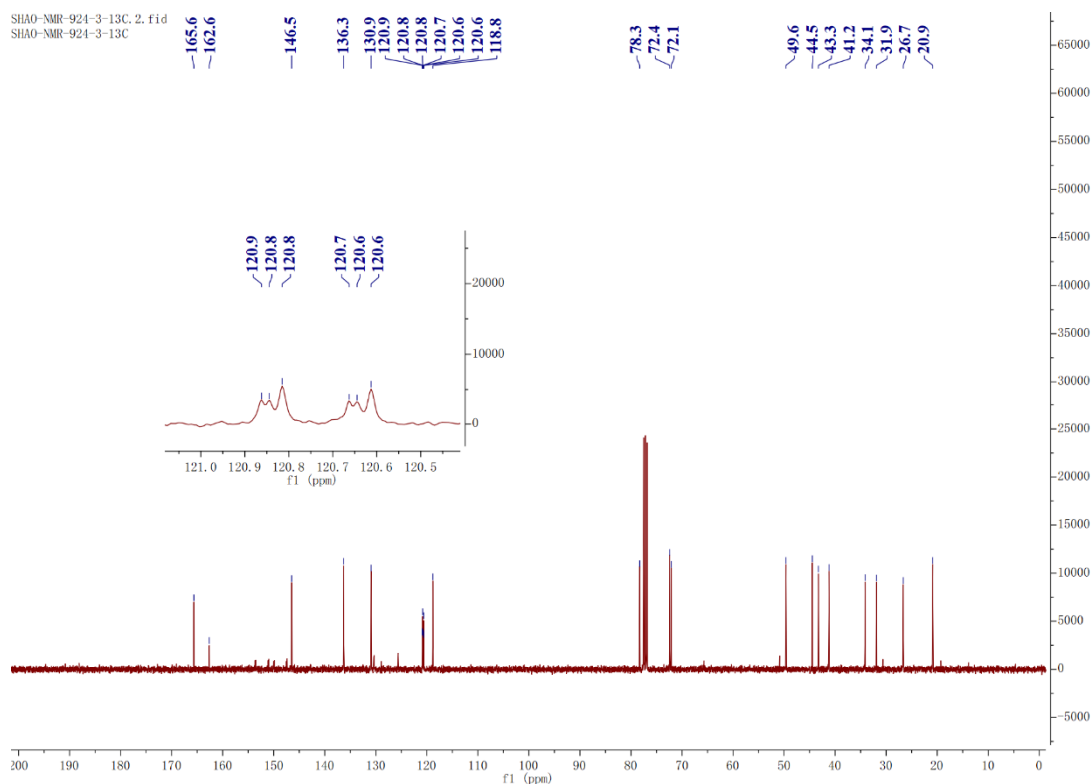

**Figure S23.**  $^{13}\text{C}$  NMR (100 MHz,  $\text{CDCl}_3$ ) spectrum of compound **8**.

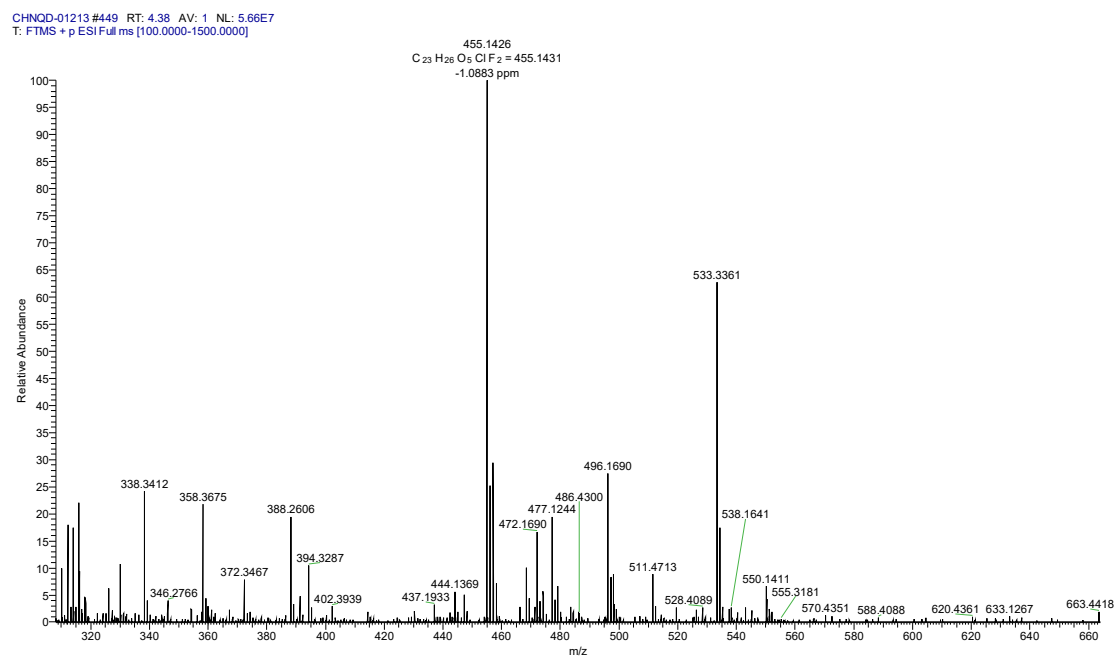

**Figure S24.** HRESIMS spectrum of compound **8**.

*Brefeldin A 4,7-O-di-2-chloro-4,5-difluorobenzoate (9)*

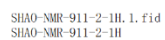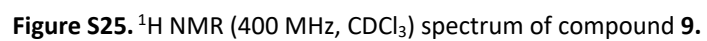

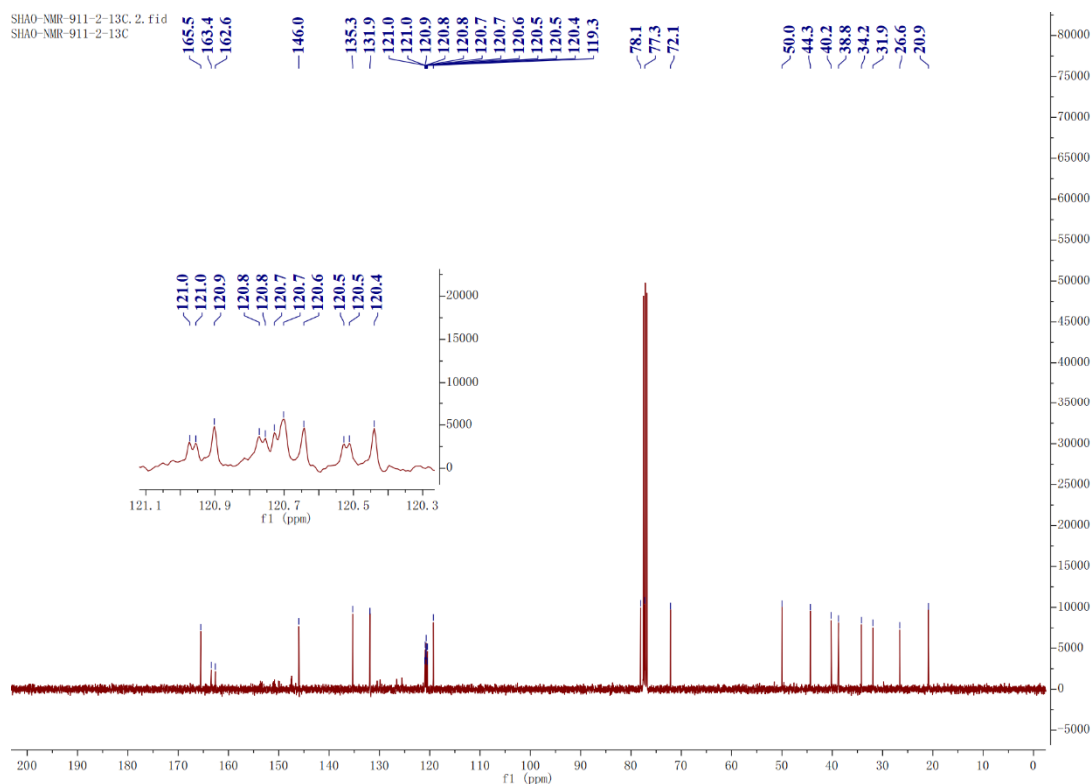

**Figure S26.**  $^{13}\text{C}$  NMR (100 MHz,  $\text{CDCl}_3$ ) spectrum of compound **9**.

CHNQD-012111 #17 RT: 0.20 AV: 1 NL: 1.03E5  
T: FTMS + p ESI Full ms [100.0000-1500.0000]

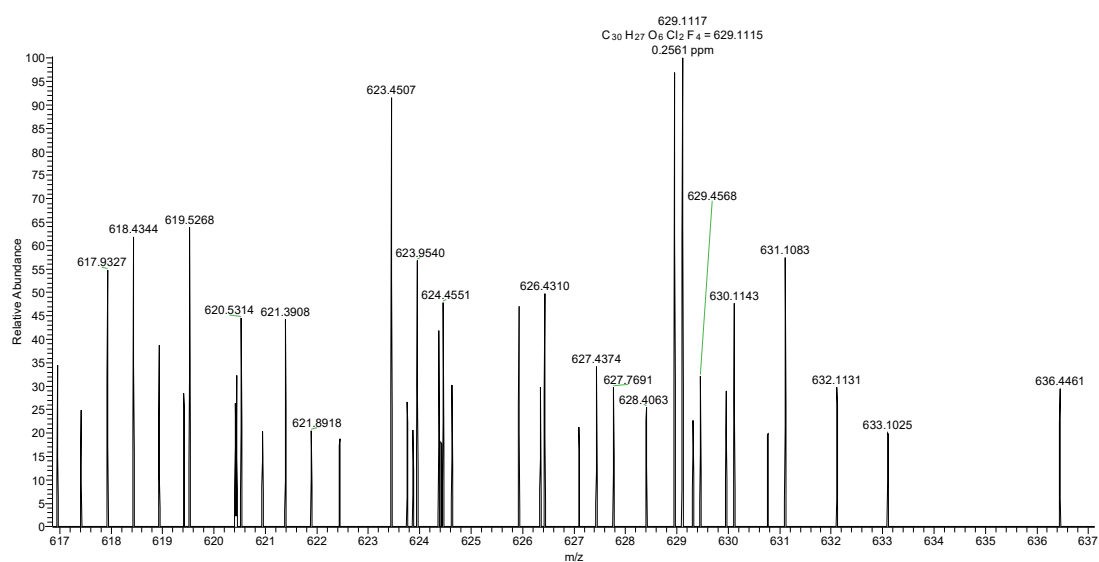

**Figure S27.** HRESIMS spectrum of compound **9**.

*Brefeldin A 7-O-(4)-chlorobenzoate (10)*

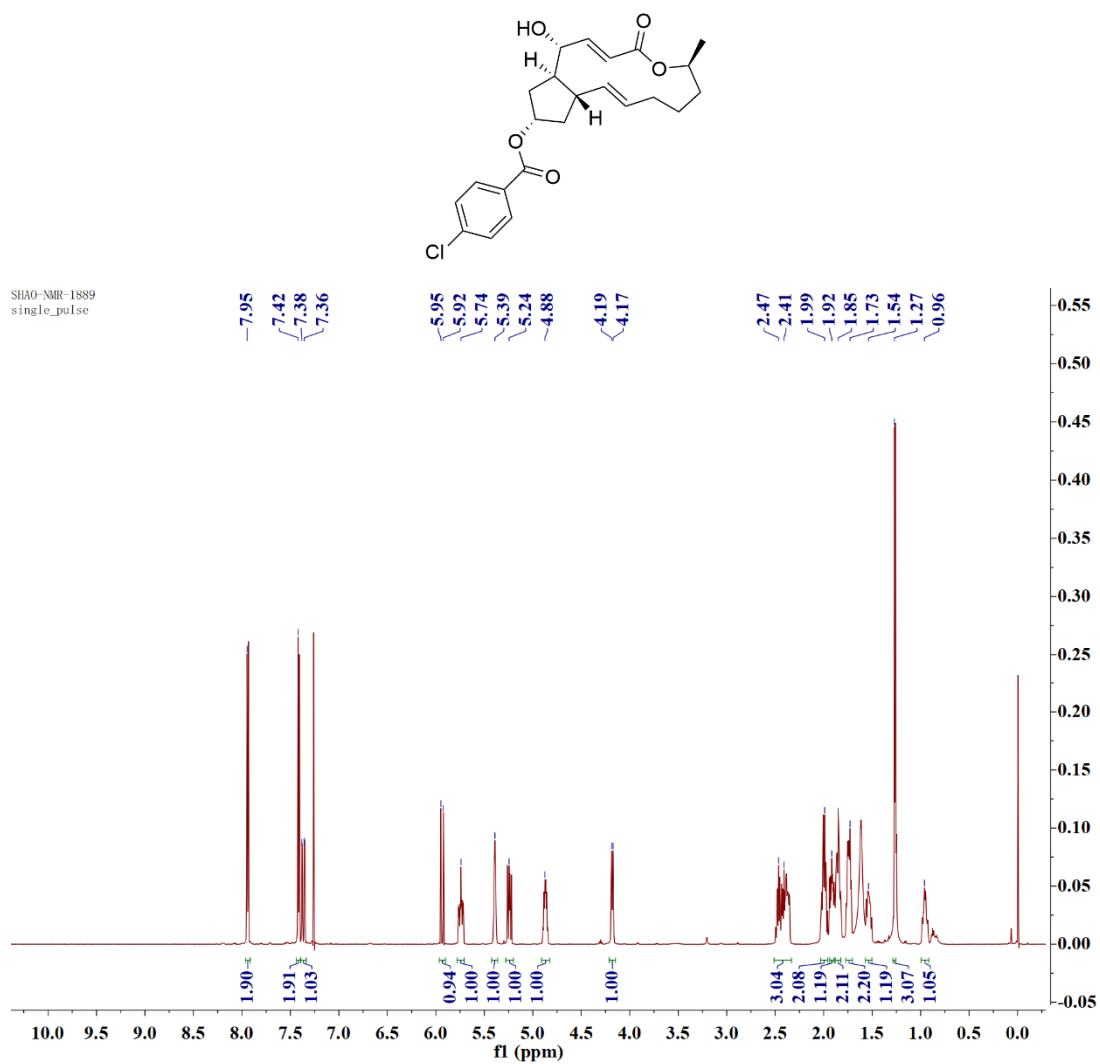

**Figure S28.**  $^1\text{H}$  NMR (600 MHz,  $\text{CDCl}_3$ ) spectrum of compound 10.

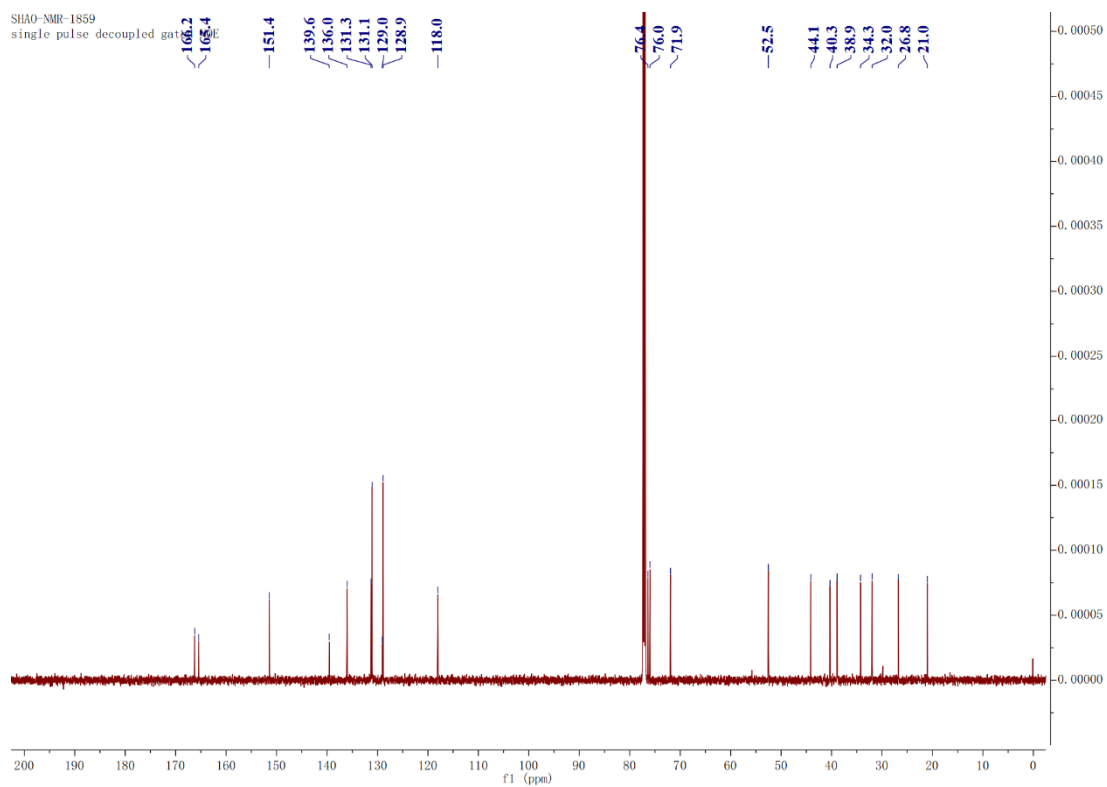

**Figure S29.**  $^{13}\text{C}$  NMR (150 MHz,  $\text{CDCl}_3$ ) spectrum of compound **10**.

CHNQD-01218 #479 RT: 4.67 AV: 1 NL: 5.90E7  
T: FTMS + p ESI Full ms [100.0000-1500.0000]

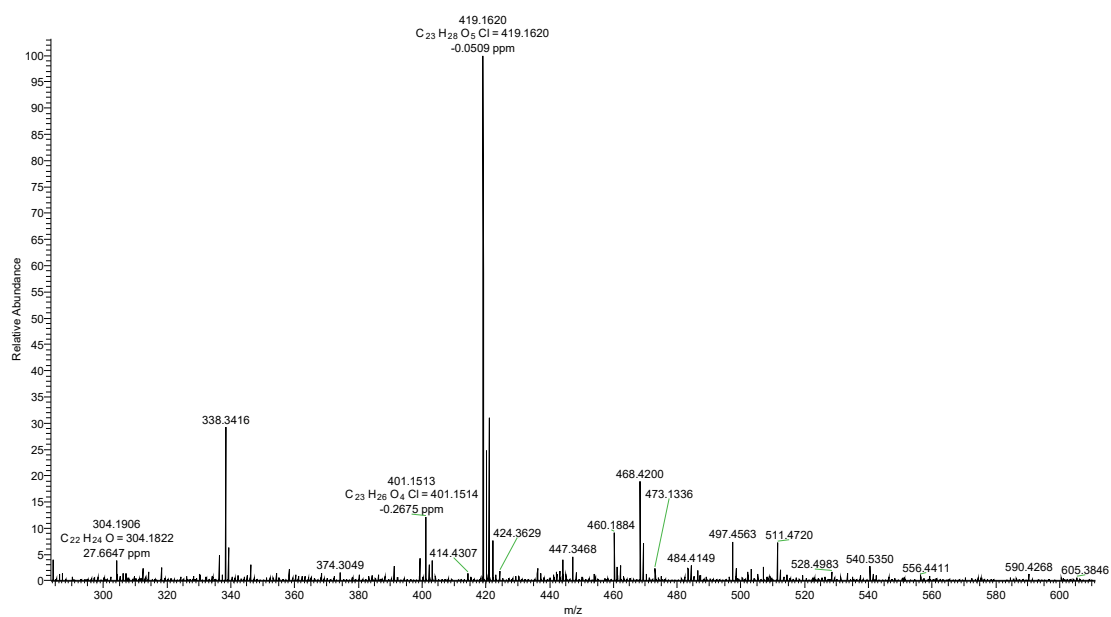

**Figure S30.** HRESIMS spectrum of compound **10**.

*Brefeldin A 4-O-(4-chlorobenzoate (11)*

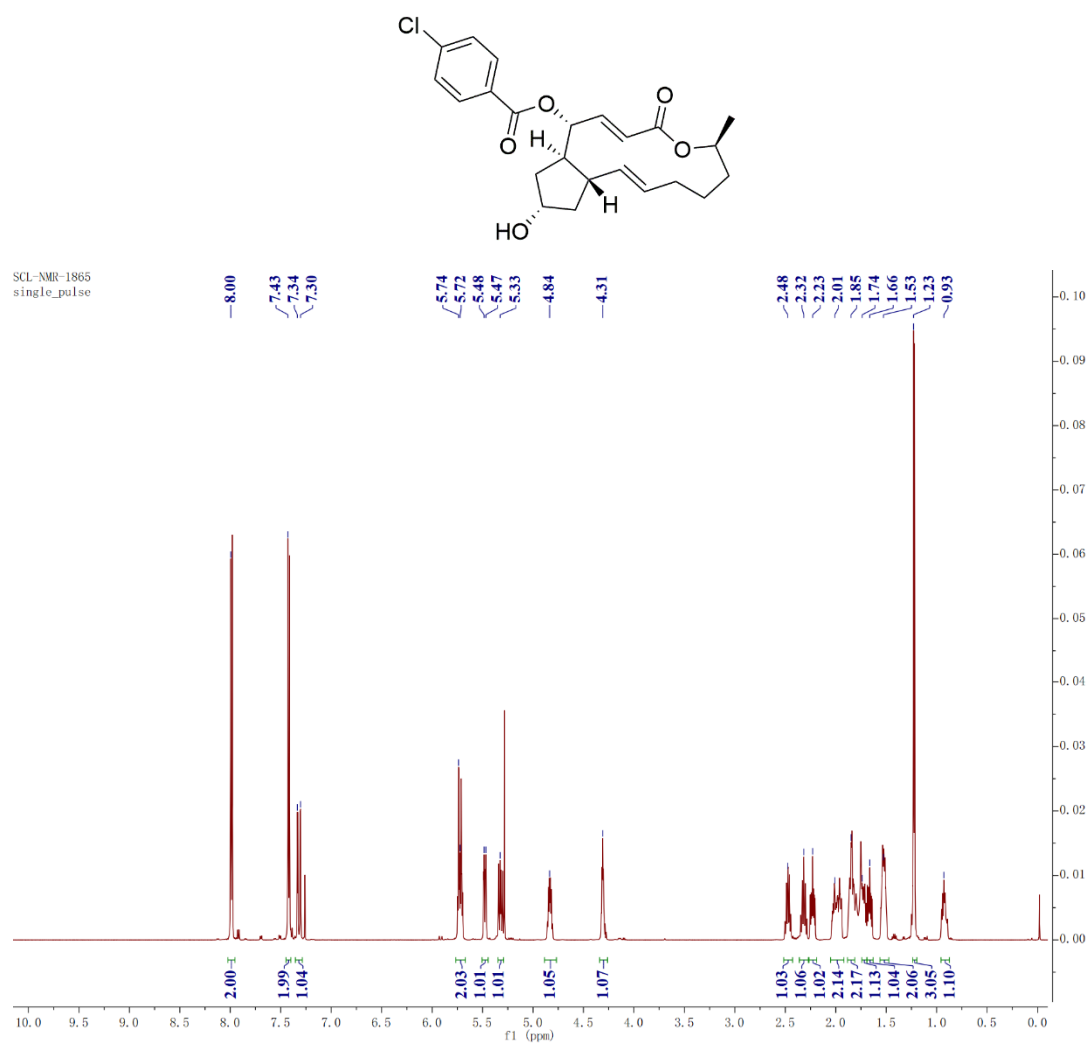

**Figure S31.**  $^1\text{H}$  NMR (600 MHz,  $\text{CDCl}_3$ ) spectrum of compound 11.

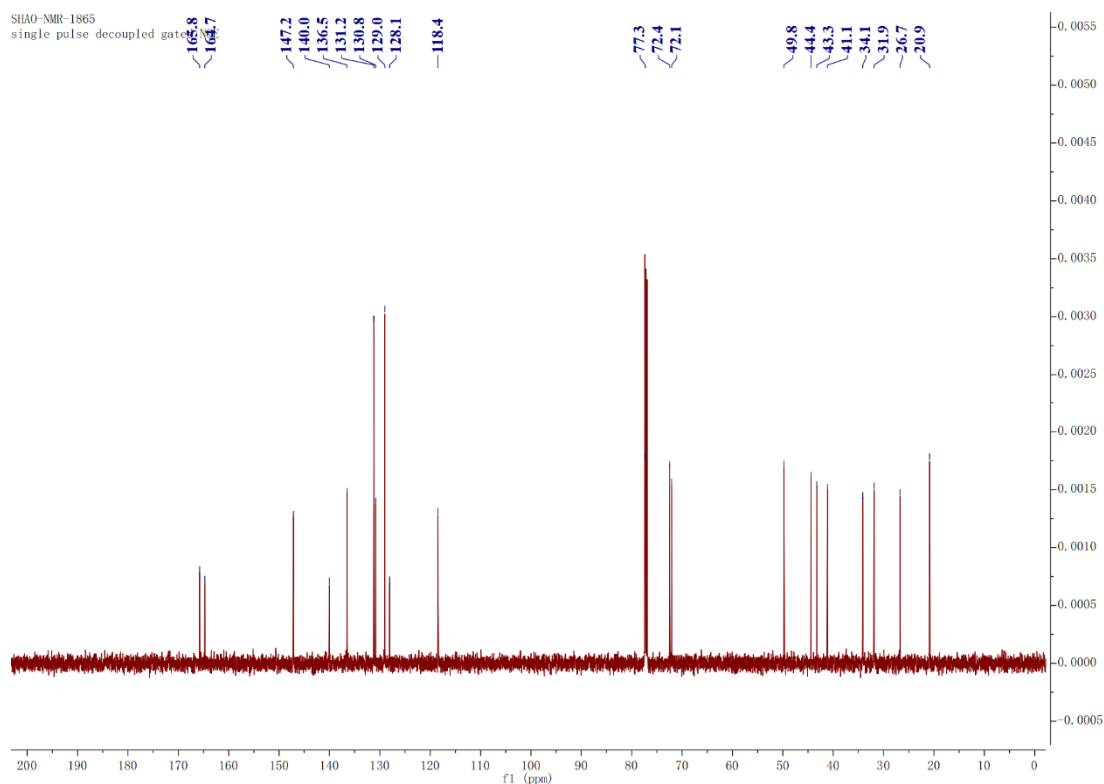

**Figure S32.**  $^{13}\text{C}$  NMR (150 MHz,  $\text{CDCl}_3$ ) spectrum of compound **11**.

26\_200119204721 #453 RT: 4.44 AV: 1 NL: 4.57E7  
T: FTMS + p ESI Full ms [100.0000-1500.0000]

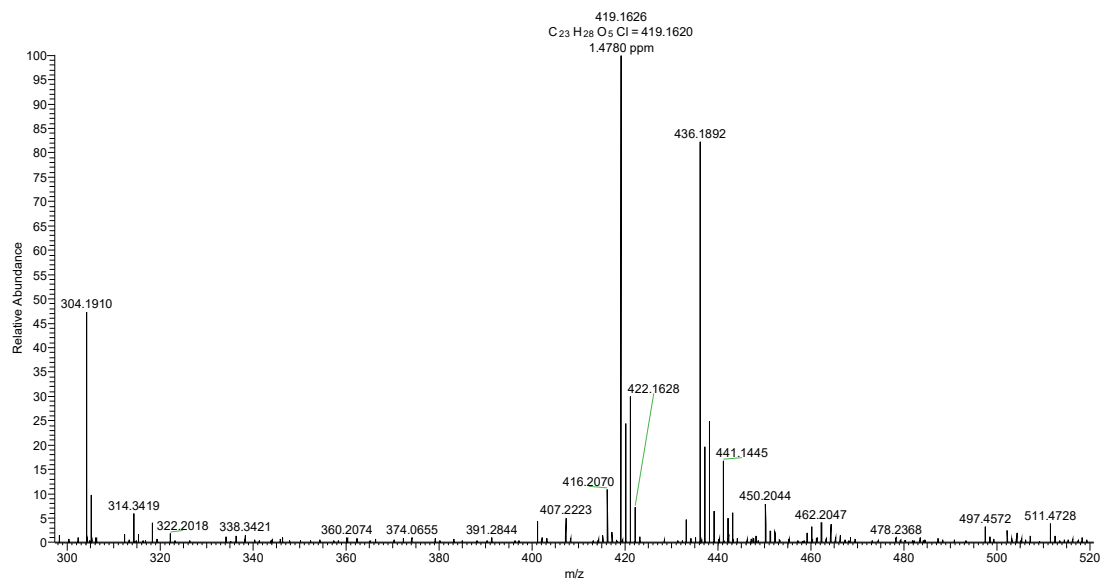

**Figure S33.** HRESIMS spectrum of compound **11**.

*Brefeldin A 4,7-O-di-(4)-chlorobenzoate (12)*



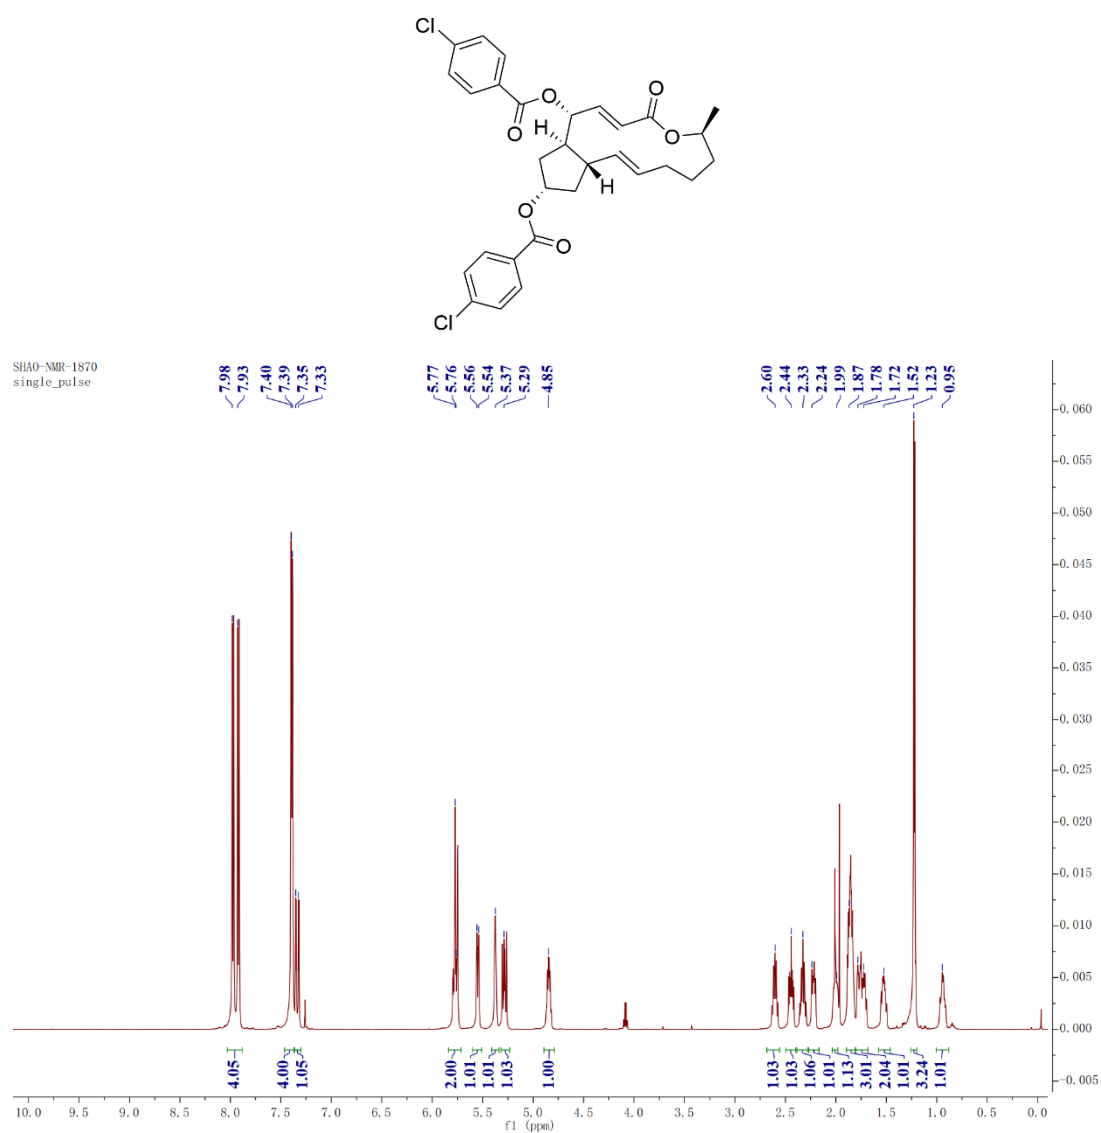

**Figure S34.** <sup>1</sup>H NMR (600 MHz, CDCl<sub>3</sub>) spectrum of compound 12.

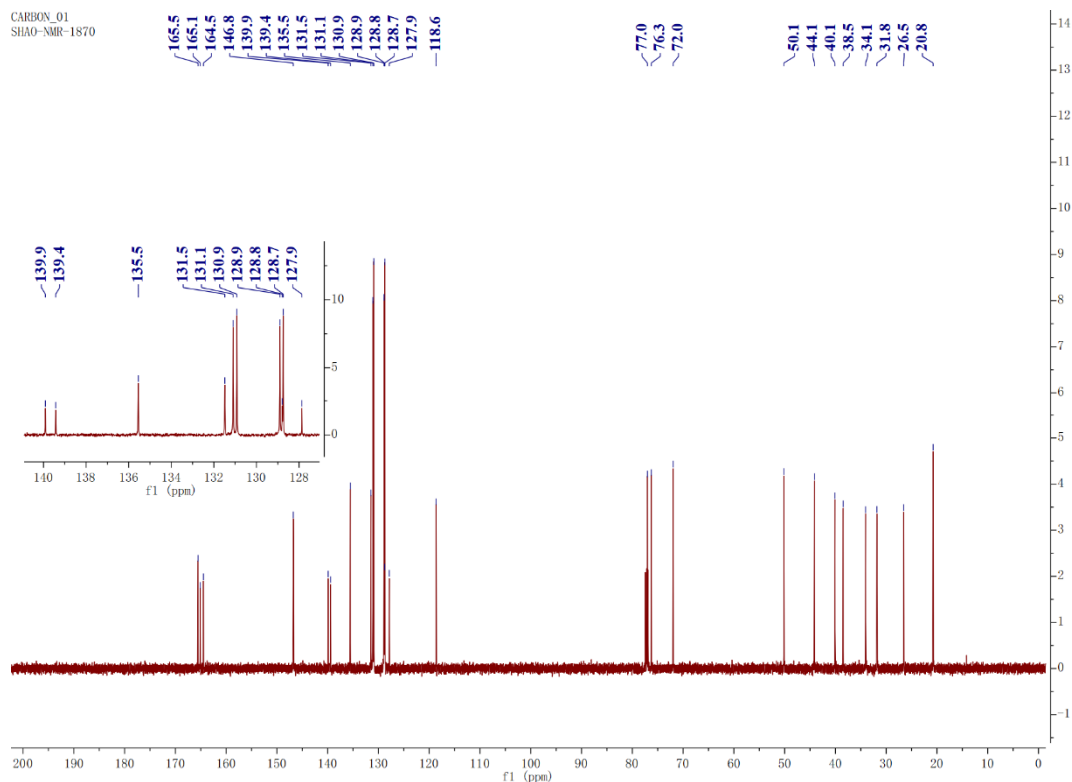

**Figure S35.**  $^{13}\text{C}$  NMR (125 MHz,  $\text{CDCl}_3$ ) spectrum of compound **12**.

CHNQD-01217 #17 RT: 0.20 AV: 1 NL: 2.37E5  
T: FTMS + p ESI Full ms [100.0000-1500.0000]

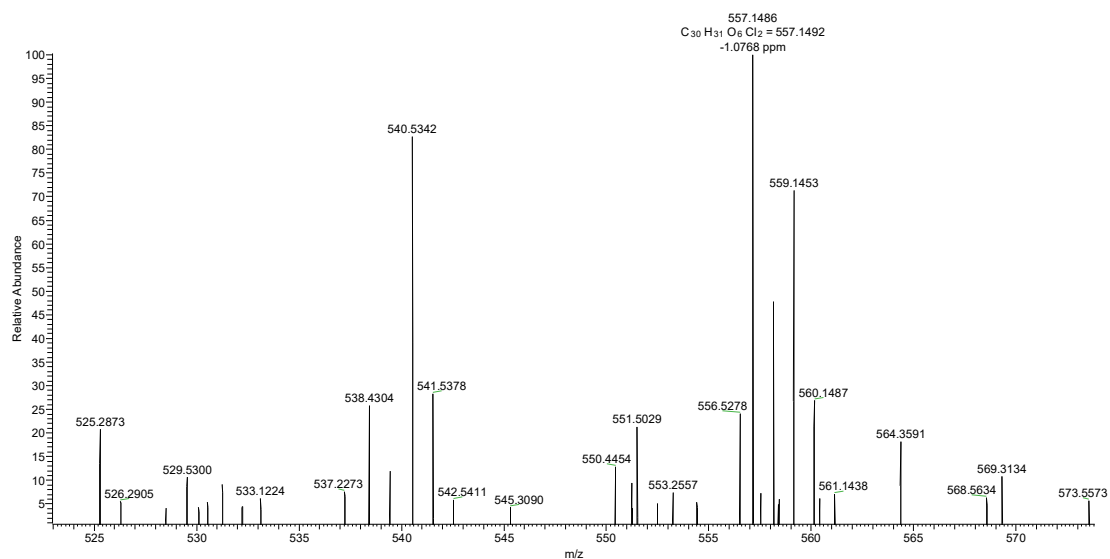

**Figure S36.** HRESIMS spectrum of compound **12**.

*Brefeldin A 7-O-2-chloro-4-fluorobenzoate (13)*

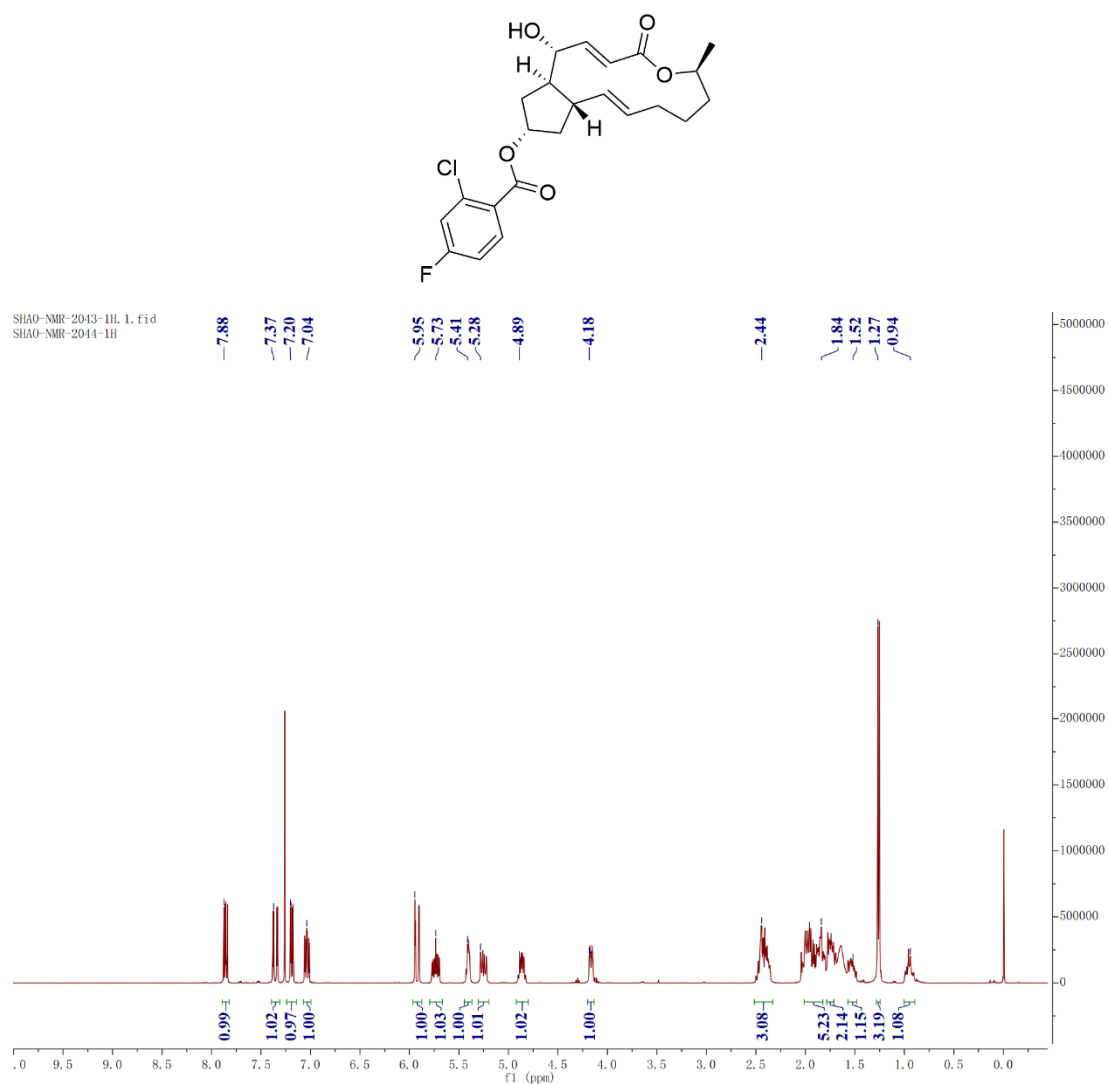

**Figure S37.**  $^1\text{H}$  NMR (400 MHz,  $\text{CDCl}_3$ ) spectrum of compound **13**.

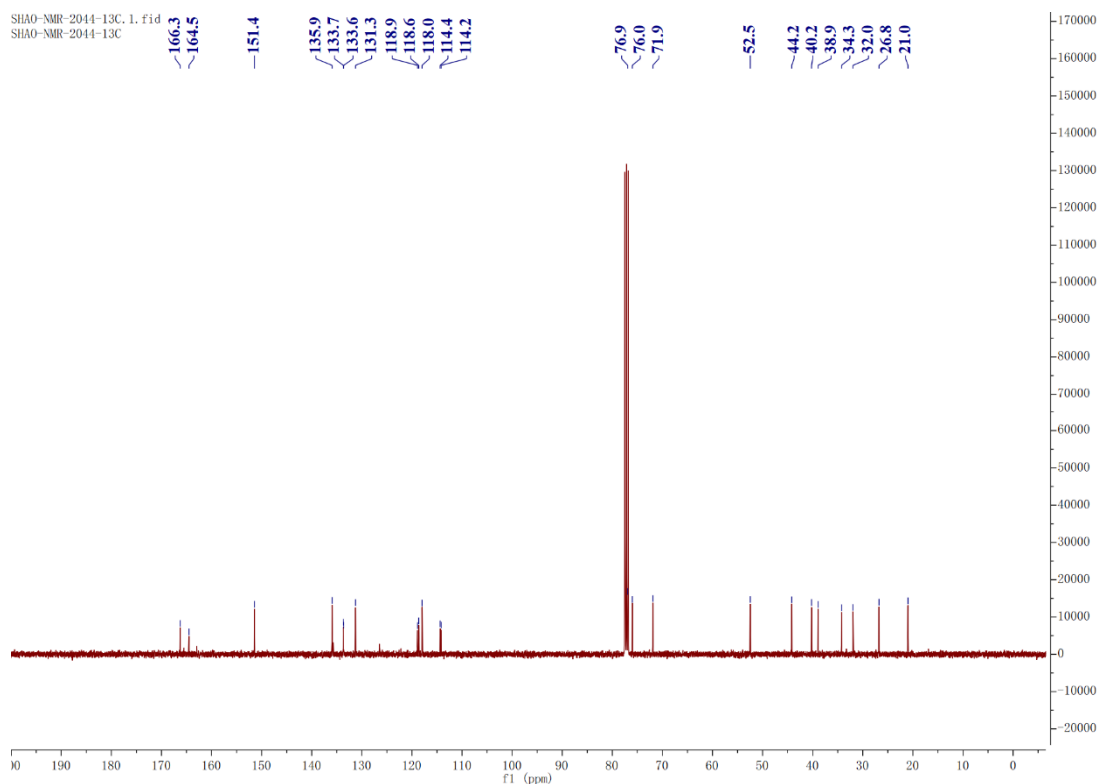

**Figure S38.**  $^{13}\text{C}$  NMR (100 MHz,  $\text{CDCl}_3$ ) spectrum of compound **13**.

CHNQD-01297 #13 RT: 0.16 AV: 1 NL: 8.76E6  
T: FTMS + p ESI Full ms [100.0000-1500.0000]

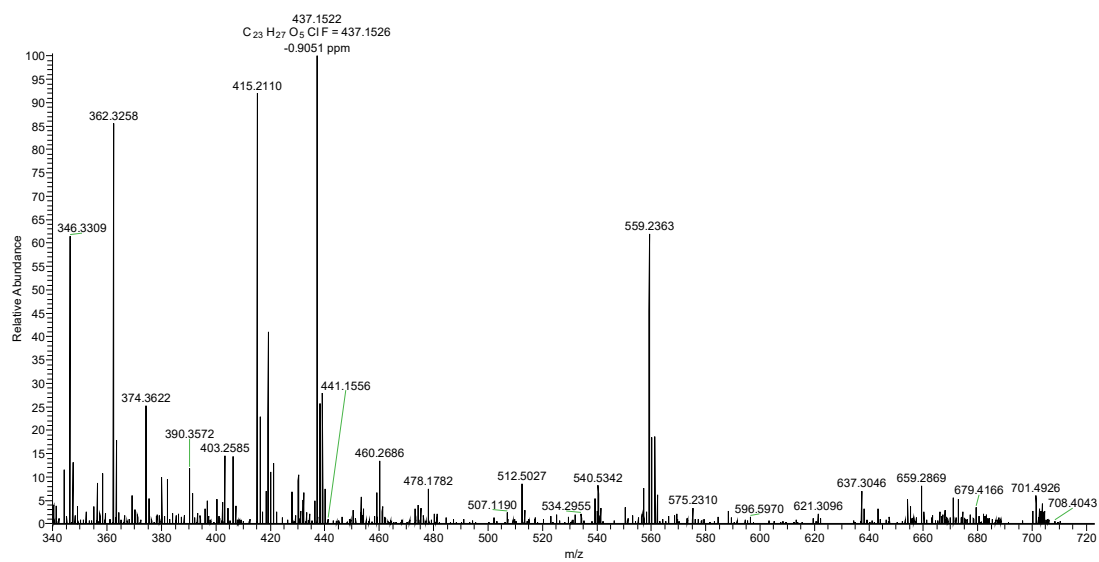

**Figure S39.** HRESIMS spectrum of compound **13**.

*Brefeldin A 4-O-2-chloro-4-fluorobenzoate (14)*

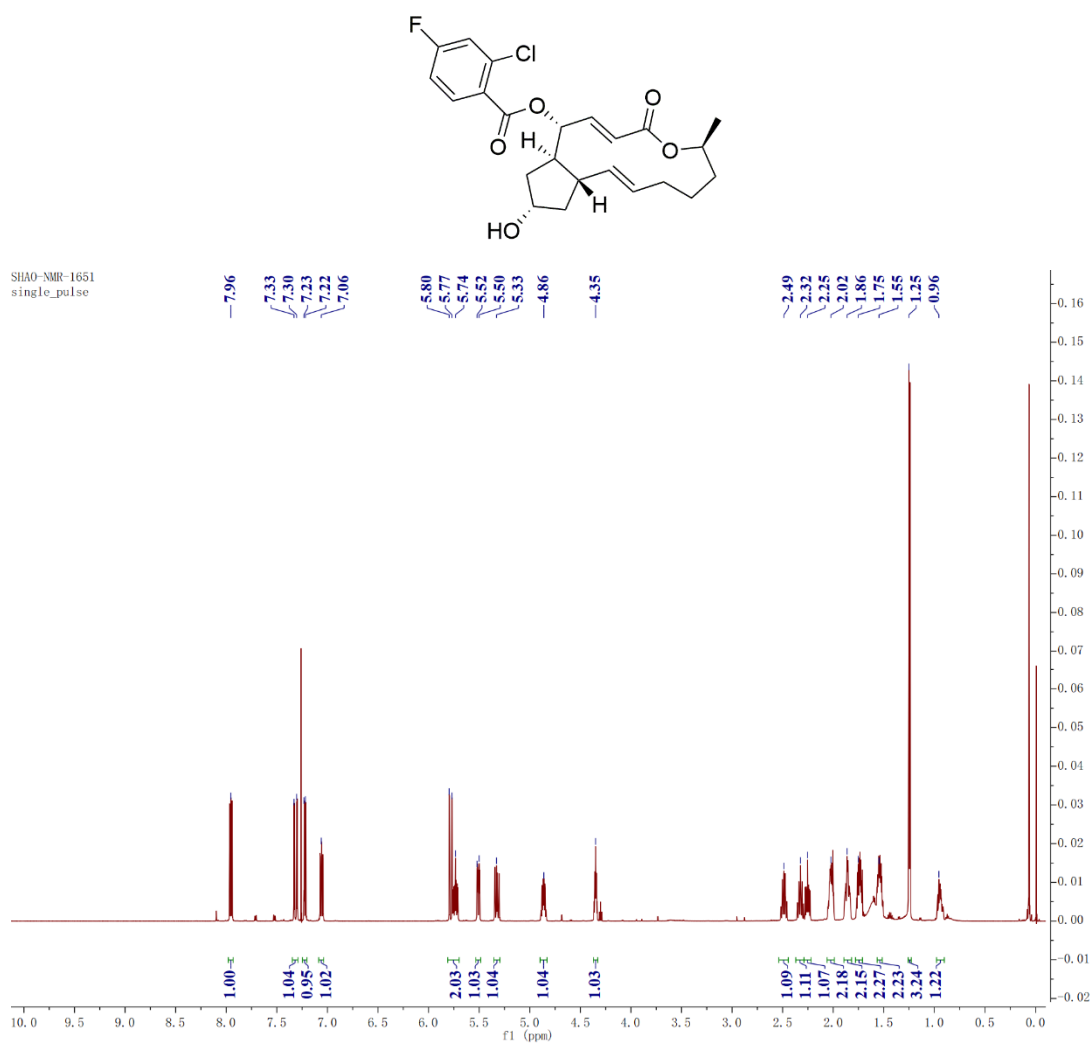

**Figure S40.** <sup>1</sup>H NMR (600 MHz, CDCl<sub>3</sub>) spectrum of compound **14**.

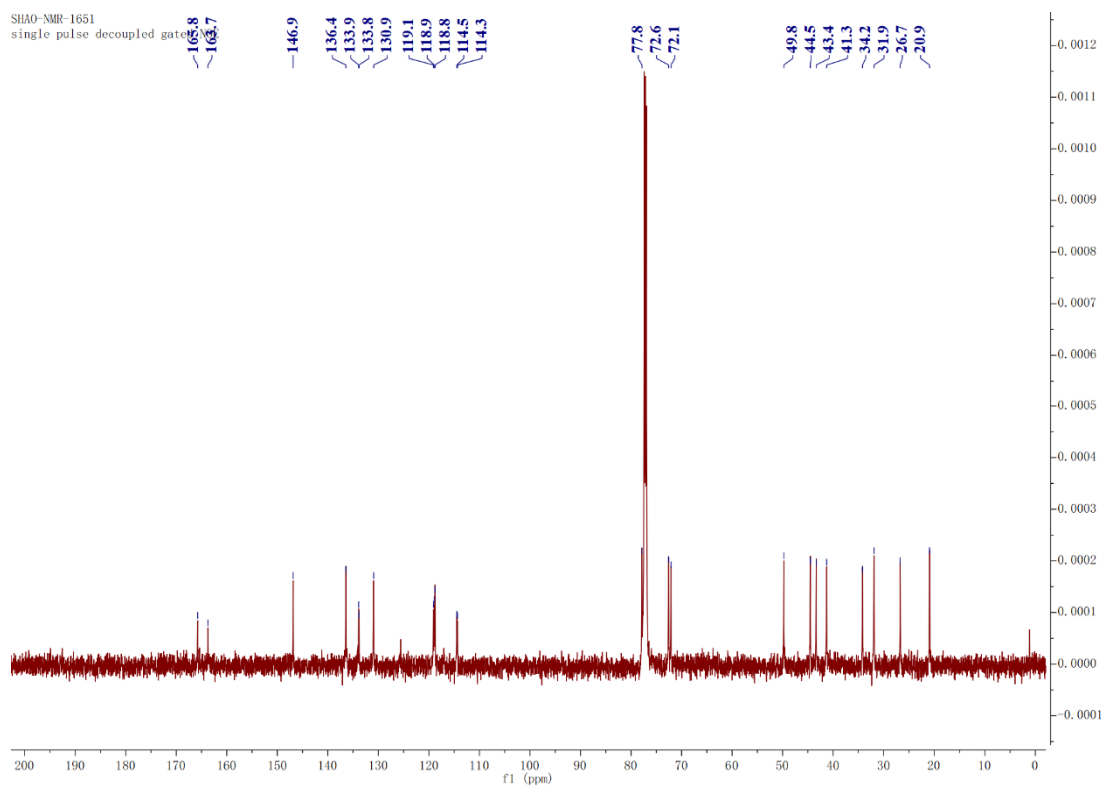

**Figure S41.**  $^{13}\text{C}$  NMR (150 MHz,  $\text{CDCl}_3$ ) spectrum of compound **14**.

14\_200119191355 #443 RT: 4.33 AV: 1 NL: 5.23E7  
T: FTMS + p ESI Full ms [100.0000-1500.0000]

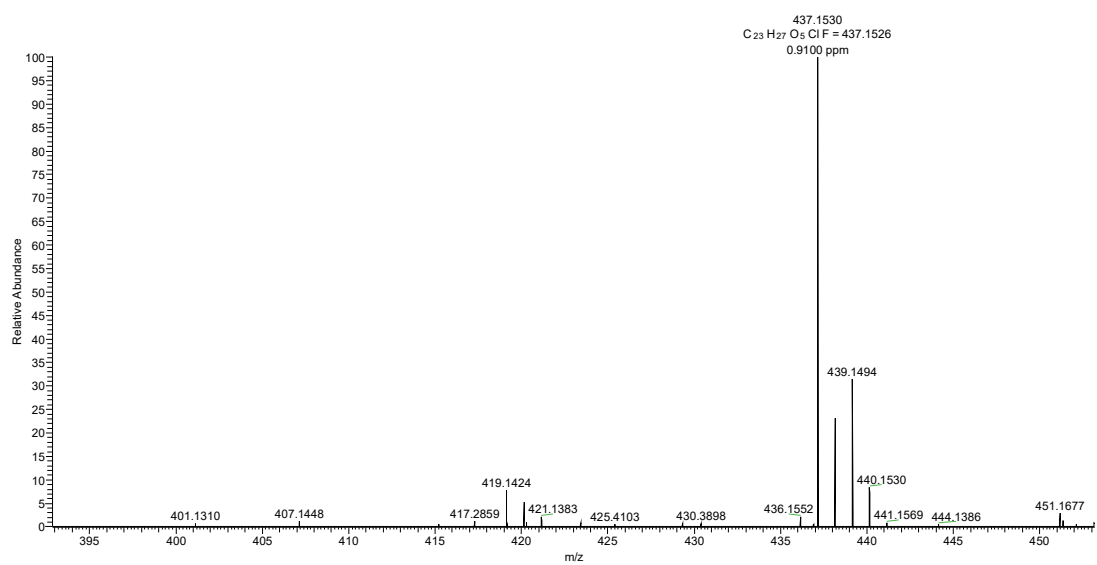

**Figure S42.** HRESIMS spectrum of compound **14**.

*Brefeldin A 4,7-O-di-2-chloro-4-fluorobenzoate (15)*

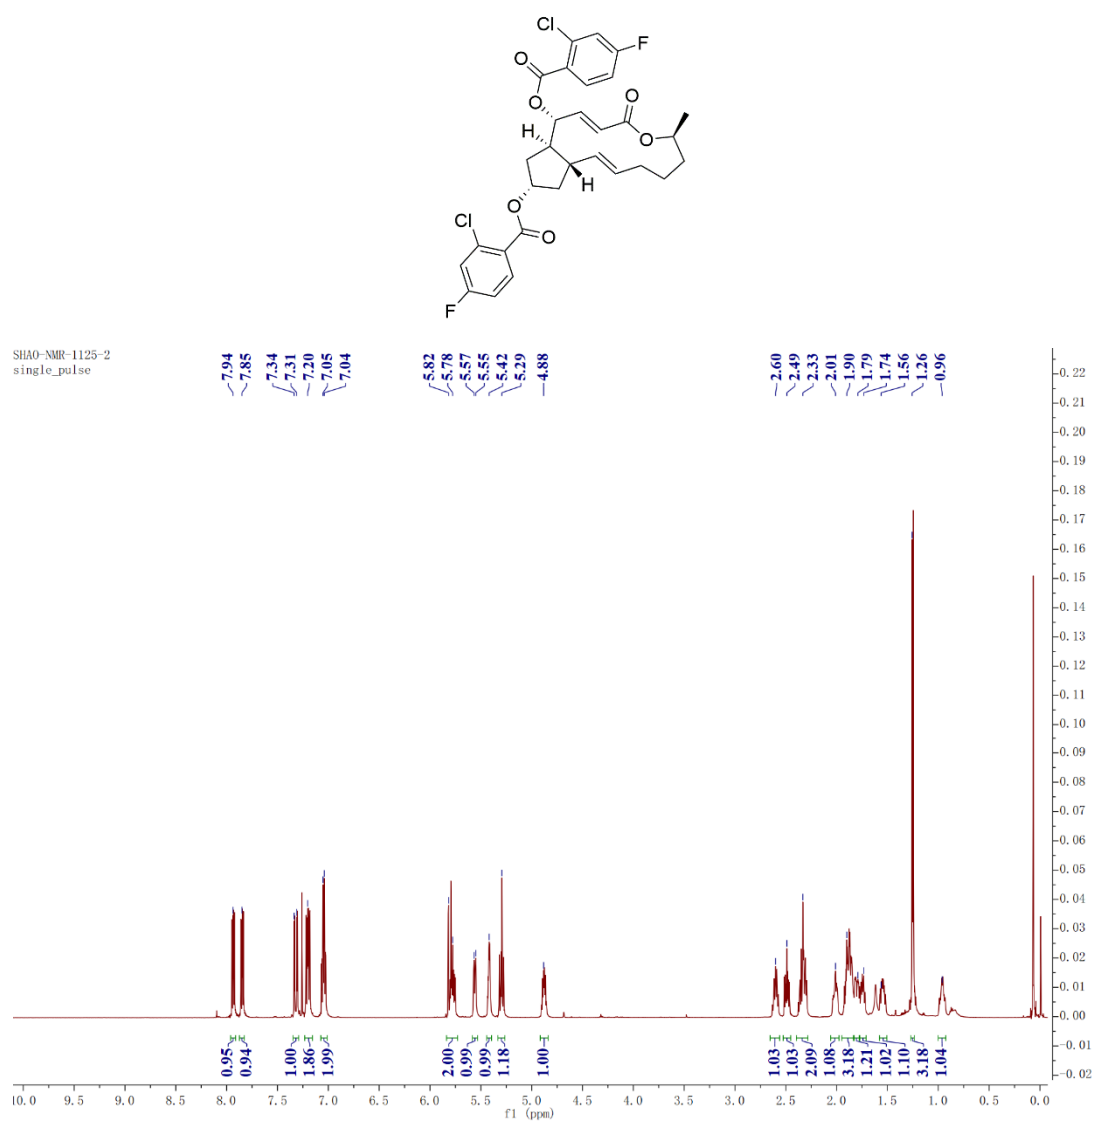

**Figure S43.**  $^1\text{H}$  NMR (600 MHz,  $\text{CDCl}_3$ ) spectrum of compound **15**.

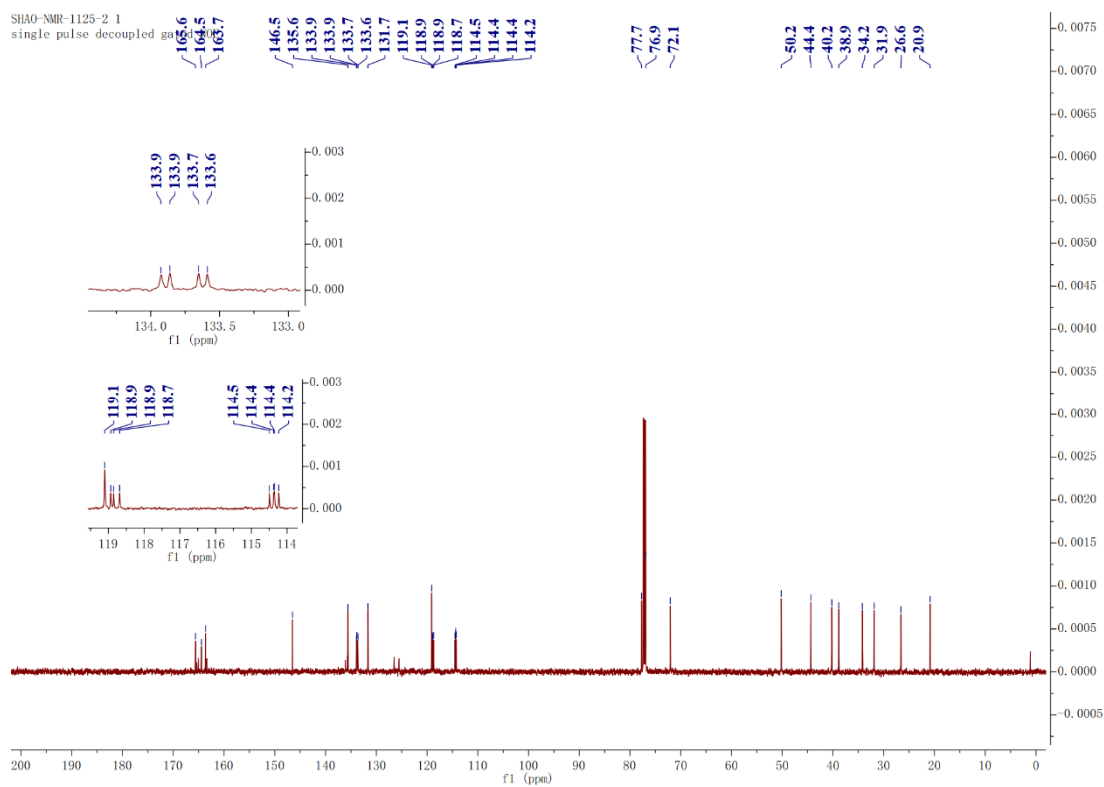

**Figure S44.**  $^{13}\text{C}$  NMR (150 MHz,  $\text{CDCl}_3$ ) spectrum of compound **15**.

CHNQD-01246 #13 RT: 0.16 AV: 1 NL: 2.01E5  
T: FTMS + p ESI Full ms [100.0000-1500.0000]

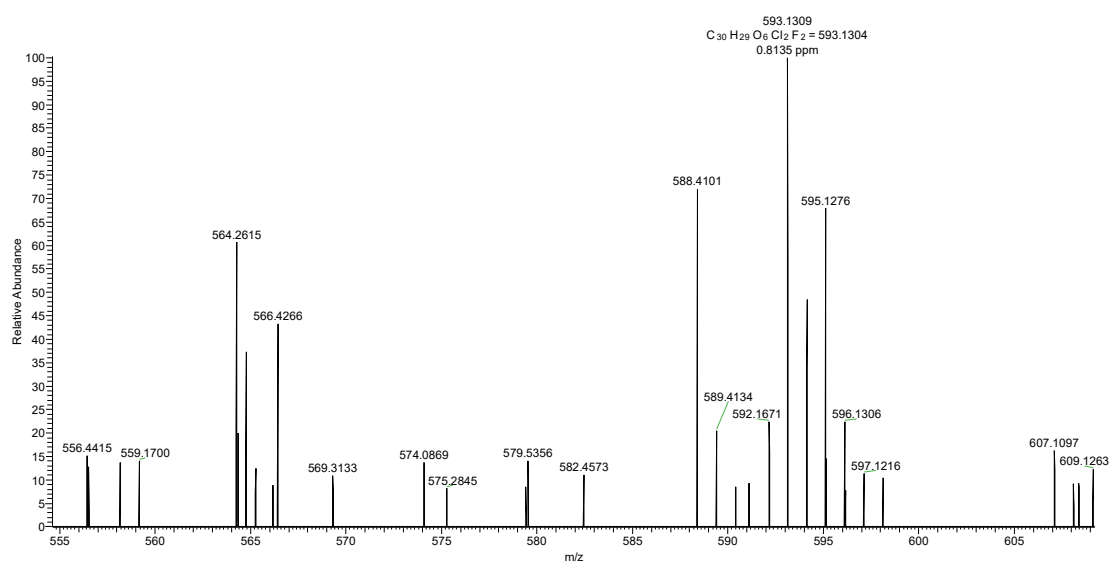

**Figure S45.** HRESIMS spectrum of compound **15**.

*Brefeldin A 7-O-(2,4,6)-trichlorobenzoate (16)*



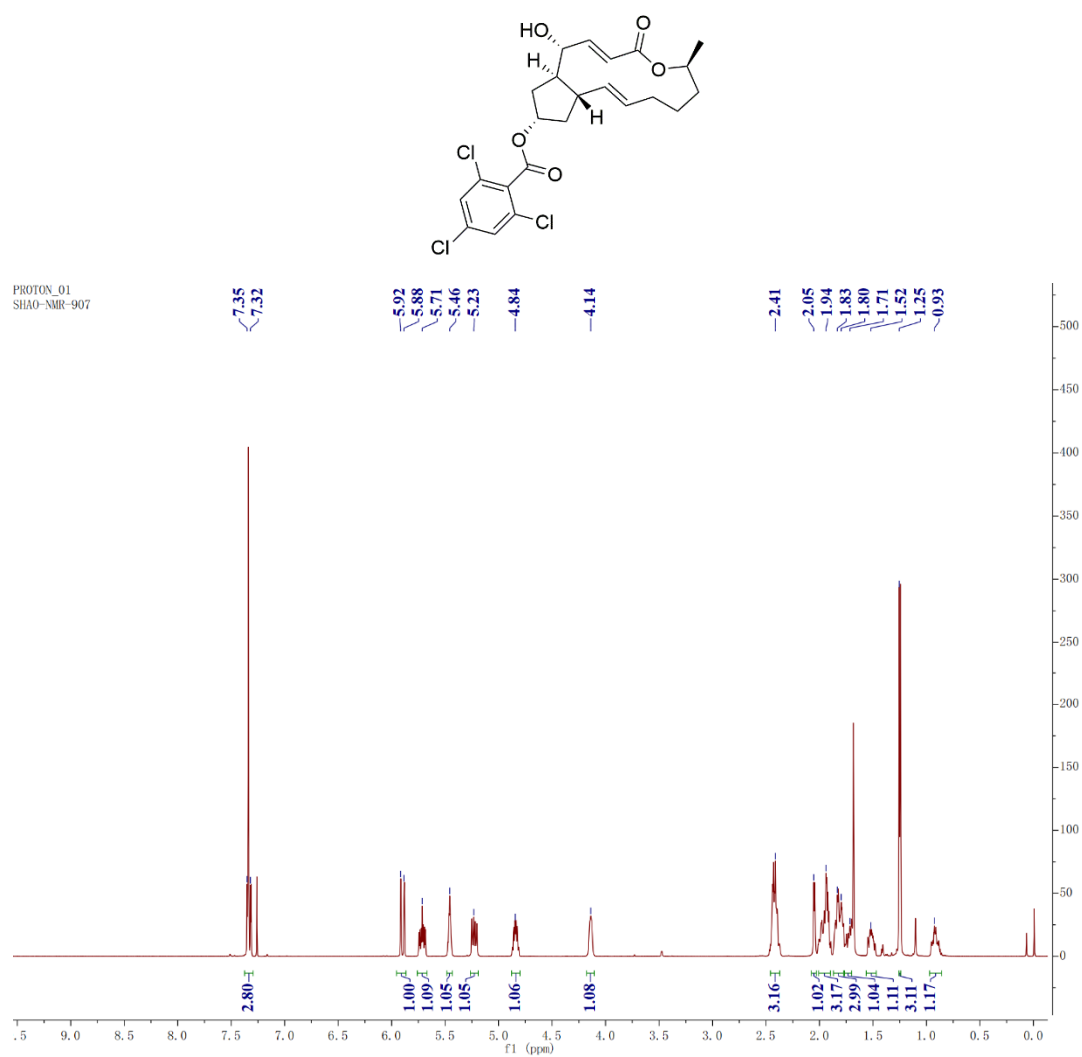

**Figure S46.** <sup>1</sup>H NMR (500 MHz, CDCl<sub>3</sub>) spectrum of compound 16.

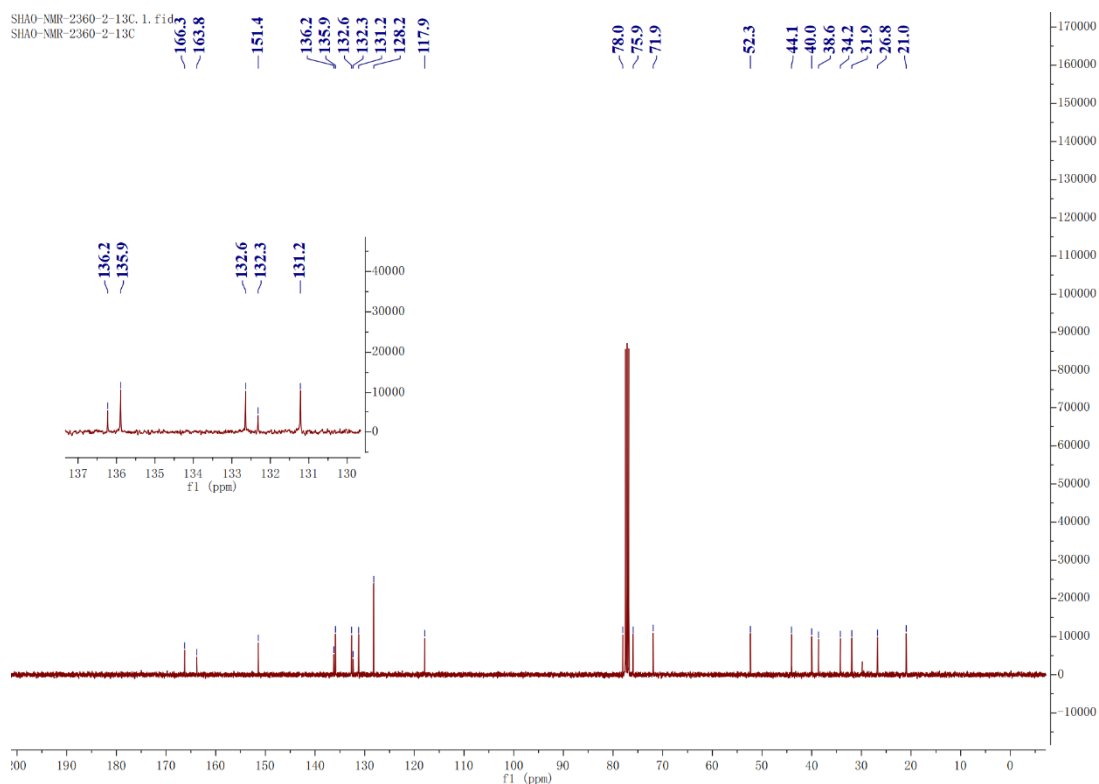

**Figure S47.**  $^{13}\text{C}$  NMR (100 MHz,  $\text{CDCl}_3$ ) spectrum of compound **16**.

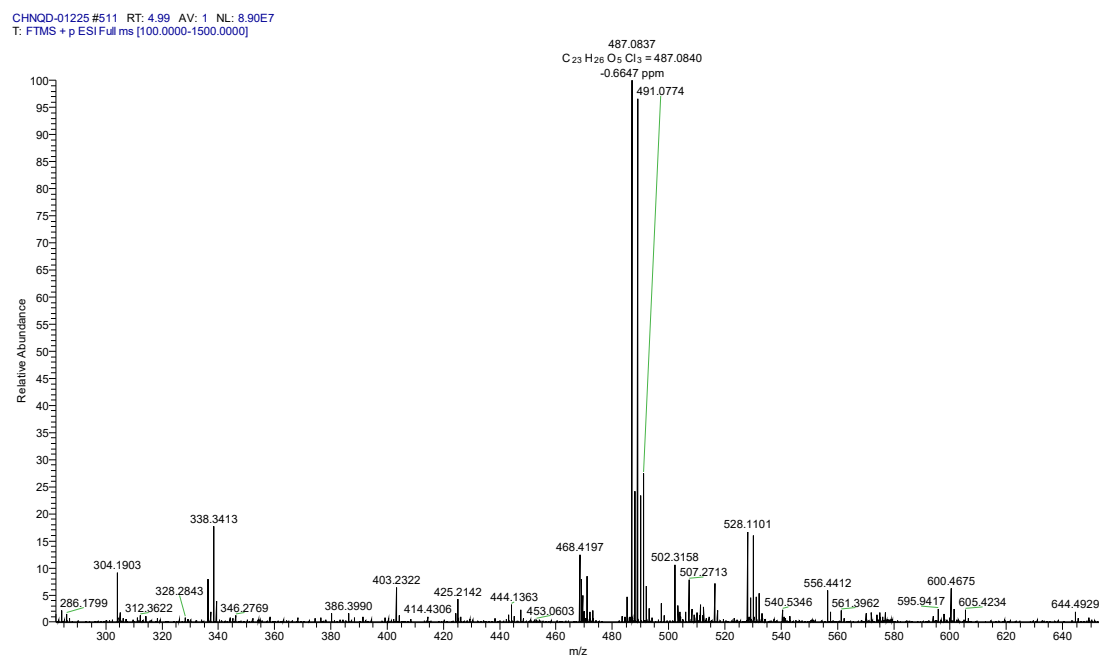

**Figure S48.** HRESIMS spectrum of compound **16**.
